# Supplementary material for: Patient characteristics, health seeking and delays among new sputum smear positive TB patients identified through active case finding when compared to passive case finding in India
Source: PubMed Central journal article supplement (PMC6415860; doi:10.1371/journal.pone.0213345), 2019-03-13
Supplement: pone.0213345.s009.pdf [file pone.0213345.s009.pdf]

**Annexure 1: Data Collection Instrument / Questionnaire**

**(PLEASE FILL USING CAPITALS LETTERS; DO NOT LEAVE ANY FIELD BLANK, MENTION MISSING)**

**Part I: Patient level Data to be collected from registers/project forms/electronic project data (District Coordinator, Project Axshya)**

*Note: - Before including the patient into the study, confirm that the patient is New Sputum Positive Pulmonary TB*

| Sno                                                                                                                    | Variable                                                                | Source of data / possible values                                 | Value |
|------------------------------------------------------------------------------------------------------------------------|-------------------------------------------------------------------------|------------------------------------------------------------------|-------|
| 1                                                                                                                      | Unique id                                                               | (TUCODE_tbregr_tbregrno)                                         |       |
| 2                                                                                                                      | Exposure status of patient                                              | Exposed-AS; Unexposed-NonAS Axshya; Unexposed-NonAxshya          |       |
| 3                                                                                                                      | Date of data collection                                                 | Dd/mm/yyyy                                                       |       |
| 4                                                                                                                      | TU name and TUCODE                                                      |                                                                  |       |
| 5                                                                                                                      | Year of registration for TB treatment (tbregr)                          | TB treatment register                                            |       |
| 6                                                                                                                      | TB registration number (tbrego)                                         | TB treatment register                                            |       |
| 7                                                                                                                      | Name of patient<br><b>Mobile number</b> of the patient                  | TB treatment register                                            |       |
| 8                                                                                                                      | Name of district                                                        |                                                                  |       |
| 9                                                                                                                      | Name of Block / City                                                    | From address of patient TB treatment register                    |       |
| 10                                                                                                                     | Name of village/ Mohalla                                                | From address of patient TB treatment register                    |       |
| 11                                                                                                                     | Whether urban or rural                                                  | DC to interpret from address of patient                          |       |
| 12                                                                                                                     | Distance (km) of Village/Mohalla from nearest PHC or Urban Dispensary   | To interpret from address of patient, if required use google map |       |
| 13                                                                                                                     | Distance (km) of Village / Mohalla from nearest DMC                     | Same as above if DMC is located in the nearest PHC/Disp.         |       |
| 14                                                                                                                     | Age in completed years                                                  | TB treatment register                                            |       |
| 15                                                                                                                     | Sex                                                                     | TB treatment register (male/female/transgender)                  |       |
| 16                                                                                                                     | DMC where sputum examination/diagnosis was done                         | TB treatment register                                            |       |
| 17                                                                                                                     | Date of sputum examination (date of diagnosis)                          | TB treatment register (dd/mm/yyyy)                               |       |
| 18                                                                                                                     | Sputum test result at diagnosis                                         | Scanty+ / 1+ / 2+ / 3+                                           |       |
| 19                                                                                                                     | Weight at baseline                                                      | TB treatment card                                                |       |
| 20                                                                                                                     | HIV status                                                              | TB treatment register (positive/negative/unknown)                |       |
| 21                                                                                                                     | Diabetes Mellitus                                                       | (positive/negative/unknown)                                      |       |
| 22                                                                                                                     | Date of treatment initiation                                            | TB treatment register (dd/mm/yyyy)                               |       |
| <b>If the patient exposure status is exposed-AS, then note the following details; else mention Not Applicable (NA)</b> |                                                                         |                                                                  |       |
| 23                                                                                                                     | Date of Axshya SAMVAD activity                                          | AS1/AS2 form (dd/mm/yyyy)                                        |       |
| 24                                                                                                                     | Patient AS status                                                       | AS1/AS2 form Referred / SCT                                      |       |
| 25                                                                                                                     | Date of referral / SCT (whichever was the final mode of sputum testing) | AS1/AS2 form (dd/mm/yyyy)                                        |       |
| 26                                                                                                                     | Serial number in AS1form                                                | AS1 form                                                         |       |
| 27                                                                                                                     | House Number in AS1 in form                                             | AS1 form                                                         |       |
