# Supplementary material for: Patient characteristics, health seeking and delays among new sputum smear positive TB patients identified through active case finding when compared to passive case finding in India
Source: PLoS One. 2019 Mar 13;14(3):e0213345. doi: 10.1371/journal.pone.0213345 (PMC6415860; doi:10.1371/journal.pone.0213345)
Supplement: S4 Annex — (XLSX) [file pone.0213345.s011.xlsx]

## Sheet: Data
enrldt	stcode	distcode	yr	formfill1	expstat	datacdt1	residence	disthf	distdmc	age	sex	dtdiag	spres	wt	hivstat	dm	dtrxinit	dtas	asstat	sctrefdt	excluded	exclrsn	formfill2	datacdt2	ednpt	ednhead	occpt	occhead	mipc	tbhh	tbdhh	prevtbhist	doe	hofever	hohemo	howtloss	advice	hcpno	dthcp	hcptype	hcptype2	alc	smk
2016-07-18	BI	CPW	2016	1	0	2016-07-18	1	3	3	16	1	2016-06-06	1	99	0	9	2016-06-07	2000-01-01	8	2000-01-01	0	8	1	2016-08-28	3	5	1	9	1160	0	0	0	2016-03-28	1	1	1	4	3	2016-03-31	2	3	0	0
2016-07-18	BI	CPW	2016	1	1	2016-07-18	1	14	14	25	2	2016-06-27	2	99	0	9	2016-06-30	2016-06-07	1	2016-06-27	0	8	1	2016-08-25	0	0	2	4	166	0	0	0	2016-03-20	1	0	1	7	2	2016-03-25	2	3	0	0
2016-07-18	BI	CPW	2016	1	1	2016-07-18	1	14	14	24	2	2016-06-27	1	99	0	9	2016-06-30	2016-06-20	1	2016-06-27	0	8	1	2016-08-28	3	2	2	6	666	1	0	0	2014-12-30	1	0	1	7	3	2015-01-02	2	3	0	0
2016-10-17	BI	CPW	2016	1	0	2016-10-17	1	15	15	35	1	2016-09-14	1	99	9	9	2016-09-16	2000-01-01	8	2000-01-01	0	8	1	2016-11-28	0	0	4	4	1333	0	0	0	2016-06-15	1	0	1	8	2	2016-06-18	1	2	1	0
2016-10-17	BI	CPW	2016	1	0	2016-10-17	1	10	10	45	2	2016-09-27	1	99	9	9	2016-09-30	2000-01-01	8	2000-01-01	0	8	1	2016-11-28	0	0	4	4	250	0	0	9	2016-08-15	1	0	1	5	2	2016-08-15	1	2	0	0
2016-11-16	BI	CPW	2016	1	0	2016-11-15	1	2	2	16	2	2016-10-03	2	99	9	9	2016-10-07	2000-01-01	8	2000-01-01	0	8	1	2017-04-28	4	0	1	4	1714	1	0	0	2016-09-20	1	0	1	5	3	2016-09-27	1	2	0	0
2016-11-16	BI	CPW	2016	1	0	2016-11-15	1	1	1	25	1	2016-10-22	1	99	9	9	2016-10-24	2000-01-01	8	2000-01-01	0	8	1	2017-04-28	1	1	3	3	909	1	1	0	2016-06-01	0	0	0	4	1	2016-11-15	1	1	0	0
2016-11-16	BI	CPW	2016	1	0	2016-11-15	1	2	2	19	1	2016-10-08	1	99	9	9	2016-10-22	2000-01-01	8	2000-01-01	0	8	1	2017-04-28	5	0	4	4	3000	1	0	0	2016-10-12	1	1	1	4	2	2016-10-12	1	1	0	0
2016-12-27	BI	CPW	2016	1	0	2016-12-16	1	30	30	45	1	2016-11-23	9	99	9	9	2016-11-23	2000-01-01	8	2000-01-01	0	8	1	2017-01-27	0	5	3	4	1000	0	0	0	2016-09-18	0	0	1	4	3	2016-09-20	1	2	1	0
2017-01-30	BI	CPW	2016	1	0	2017-01-30	1	3	3	25	1	2016-12-12	2	99	9	9	2016-12-12	2000-01-01	8	2000-01-01	0	8	1	2017-04-28	0	0	4	4	4000	0	0	0	2016-11-20	1	0	1	8	2	2016-11-30	1	2	0	0
2017-01-30	BI	CPW	2016	1	0	2017-01-30	1	18	18	60	2	2016-12-20	9	99	9	9	2016-12-21	2000-01-01	8	2000-01-01	0	8	1	2017-04-26	0	4	0	4	400	0	0	0	2016-10-15	1	1	0	4	5	2016-10-30	1	1	0	1
2017-01-30	BI	CPW	2016	1	0	2017-01-30	0	2	2	17	2	2016-12-28	3	99	9	9	2016-12-30	2000-01-01	8	2000-01-01	0	8	1	2017-04-28	5	4	1	6	3000	0	0	0	2016-11-10	1	1	1	4	3	2016-11-12	1	2	0	0
2017-02-23	BI	CPW	2017	1	0	2017-02-18	1	15	15	30	2	2017-01-02	2	99	9	9	2017-01-04	2000-01-01	8	2000-01-01	0	8	1	2017-04-26	0	3	2	4	800	1	1	0	2016-05-15	1	0	1	4	5	2016-05-30	1	2	0	0
2017-02-23	BI	CPW	2017	1	0	2017-02-18	1	8	8	30	2	2017-01-25	1	99	9	9	2017-01-28	2000-01-01	8	2000-01-01	0	8	1	2017-04-26	0	0	7	4	2200	1	0	0	2016-11-15	1	1	1	8	3	2016-11-30	1	2	0	0
2017-02-23	BI	CPW	2017	1	0	2017-02-18	1	3	3	30	2	2017-01-25	0	99	9	9	2017-01-28	2000-01-01	8	2000-01-01	0	8	1	2017-04-26	0	2	2	4	2000	0	0	0	2016-10-30	1	1	1	8	3	2016-11-15	2	3	0	0
2016-06-13	BI	CPW	2016	1	0	2016-06-13	1	10	10	62	1	2016-04-29	2	99	9	9	2016-05-04	2000-01-01	8	2000-01-01	0	8	1	2016-12-07	0	0	4	4	700	0	0	0	2016-01-15	1	0	1	9	3	2016-02-10	1	2	0	0
2016-06-13	BI	CPW	2016	1	0	2016-06-13	1	25	25	62	1	2016-05-17	1	99	9	9	2016-05-23	2000-01-01	8	2000-01-01	0	8	1	2016-12-07	0	0	5	5	1500	1	1	0	2016-03-15	1	0	1	9	2	2016-03-20	1	2	0	0
2016-06-13	BI	CPW	2016	1	0	2016-06-13	1	15	15	46	1	2016-05-19	2	99	9	9	2016-05-23	2000-01-01	8	2000-01-01	0	8	1	2016-12-07	2	5	3	3	425	0	0	0	2016-01-30	1	1	1	9	1	2016-01-30	1	1	1	1
2016-06-13	BI	CPW	2016	1	1	2016-06-13	1	35	35	30	1	2016-05-28	3	99	9	9	2016-05-30	2016-05-02	1	2016-05-23	0	8	1	2016-12-07	0	0	4	4	546	0	0	0	2016-04-10	1	0	1	7	3	2016-04-15	2	3	0	0
2016-06-13	BI	CPW	2016	1	1	2016-06-13	1	35	35	55	2	2016-05-23	1	99	9	9	2016-05-30	2016-05-06	1	2016-05-23	0	8	1	2016-12-07	0	3	2	4	430	1	0	0	2016-02-28	0	0	0	7	3	2016-03-10	1	2	0	0
2016-06-13	BI	CPW	2016	1	1	2016-06-13	1	35	35	35	2	2016-05-20	2	99	9	9	2016-05-23	2016-05-06	1	2016-05-20	0	8	1	2016-12-07	4	4	2	2	2500	0	0	0	2016-05-05	1	0	0	7	1	2016-05-20	1	1	0	0
2016-07-18	BI	CPW	2016	1	0	2016-07-18	1	20	20	62	2	2016-06-02	0	36	0	9	2016-06-06	2000-01-01	8	2000-01-01	0	8	1	2016-08-27	0	0	3	0	428	0	0	0	2014-04-15	1	0	1	8	4	2014-04-22	2	3	0	0
2016-07-18	BI	CPW	2016	1	1	2016-07-18	1	30	30	25	1	2016-06-13	1	40	0	9	2016-06-17	2016-06-06	1	2016-06-13	0	8	1	2016-08-27	1	0	4	4	285	0	0	0	2016-06-12	1	0	0	7	1	2016-06-13	1	1	1	0
2016-08-24	BI	CPW	2016	1	1	2016-08-24	1	99	10	35	2	2016-06-22	1	35	9	9	2016-07-04	2016-06-14	1	2016-06-22	0	8	1	2016-09-15	0	0	4	4	380	0	0	0	2016-04-15	1	0	1	7	2	2016-04-08	2	3	0	0
2016-08-24	BI	CPW	2016	1	1	2016-08-24	1	99	12	40	2	2016-06-23	1	40	9	9	2016-07-04	2016-06-20	1	2016-06-23	0	8	1	2016-09-15	0	1	2	4	300	0	0	0	2016-04-20	1	1	1	7	99	2016-04-25	2	3	9	9
2016-08-24	BI	CPW	2016	1	1	2016-08-24	1	99	10	50	1	2016-06-27	0	35	9	9	2016-07-04	2016-06-26	1	2016-06-27	0	8	1	2016-09-15	0	0	4	4	166	0	0	0	2016-06-15	1	1	1	7	3	2016-06-16	2	3	1	1
2016-08-24	BI	CPW	2016	1	0	2016-08-24	1	12	12	25	1	2016-06-28	2	45	0	9	2016-07-01	2000-01-01	8	2000-01-01	0	8	1	2016-09-14	1	1	4	4	375	0	0	9	2016-04-18	0	1	1	4	3	2016-04-22	2	3	1	0
2016-07-18	BI	CPW	2016	1	1	2016-07-18	1	30	30	21	2	2016-06-27	2	35	0	9	2016-06-29	2016-06-05	1	2016-06-27	0	8	1	2016-08-27	0	0	2	4	1050	0	0	0	2016-05-15	1	0	1	8	1	2016-06-27	1	1	0	0
2016-08-24	BI	CPW	2016	1	1	2016-08-24	1	99	32	65	1	2016-06-23	2	45	0	9	2016-07-04	2016-07-04	1	2016-06-23	0	8	1	2016-09-15	1	1	3	3	266	0	0	0	2016-04-15	1	1	1	7	2	2016-05-15	2	3	0	0
2016-08-24	BI	CPW	2016	1	0	2016-08-24	1	99	25	35	2	2016-07-04	2	35	0	9	2016-07-04	2000-01-01	8	2000-01-01	0	8	1	2016-09-15	0	0	2	4	266	0	0	9	2016-01-15	1	1	1	4	2	2016-01-20	2	3	0	0
2016-08-24	BI	CPW	2016	1	0	2016-08-24	1	99	5	65	2	2016-07-12	1	40	0	9	2016-07-15	2000-01-01	8	2000-01-01	0	8	1	2016-09-14	0	1	2	3	750	0	0	9	2015-10-30	1	1	1	3	3	2015-11-05	2	3	0	1
2016-09-20	BI	CPW	2016	1	1	2016-09-20	1	35	35	55	2	2016-07-20	1	25	0	9	2016-08-03	2016-07-09	1	2016-07-20	0	8	1	2016-10-26	0	0	2	4	2000	0	0	9	2016-06-15	1	0	1	7	2	2016-06-18	1	2	0	0
2016-09-20	BI	CPW	2016	1	0	2016-09-20	1	12	12	40	1	2016-08-03	1	34	0	9	2016-08-05	2000-01-01	8	2000-01-01	0	8	1	2016-10-27	0	0	4	4	466	0	0	0	2015-05-15	1	1	1	8	2	2015-05-20	2	3	1	0
2016-09-20	BI	CPW	2016	1	0	2016-09-20	1	25	25	18	2	2016-08-02	3	36	0	9	2016-08-10	2000-01-01	8	2000-01-01	0	8	1	2016-10-27	0	0	2	5	300	0	0	0	2016-05-15	1	0	1	8	3	2016-05-18	2	3	0	0
2016-09-20	BI	CPW	2016	1	1	2016-09-20	1	10	10	15	1	2016-07-29	0	35	9	9	2016-08-08	2016-06-26	1	2016-07-29	0	8	1	2016-10-26	0	0	4	4	143	1	0	0	2016-06-15	1	0	1	7	2	2016-06-17	2	3	0	0
2016-09-20	BI	CPW	2016	1	1	2016-09-20	1	12	12	45	1	2016-08-04	2	37	9	9	2016-08-22	2016-08-01	1	2016-08-04	0	8	1	2016-10-27	0	0	8	8	2083	1	1	0	2016-07-20	1	0	1	7	2	2016-07-21	1	2	1	0
2016-09-20	BI	CPW	2016	1	1	2016-09-20	1	12	12	50	1	2016-08-13	2	42	9	9	2016-08-31	2016-08-02	1	2016-08-13	0	8	1	2016-10-26	1	1	4	4	125	0	0	0	2016-02-28	1	0	1	7	3	2016-03-02	1	2	0	0
2016-09-20	BI	CPW	2016	1	1	2016-09-20	1	12	12	60	1	2016-08-29	1	45	9	9	2016-08-31	2016-08-07	1	2016-08-29	0	8	1	2016-10-26	1	1	3	4	385	1	1	0	2015-11-15	0	1	1	7	3	2015-11-20	1	2	1	1
2016-09-20	BI	CPW	2016	1	0	2016-09-20	1	35	35	40	1	2016-08-01	0	35	0	9	2016-08-17	2000-01-01	8	2000-01-01	0	8	1	2016-10-26	0	0	4	4	208	0	0	0	2016-03-15	1	0	1	8	4	2016-03-18	2	3	0	0
2016-09-20	BI	CPW	2016	1	0	2016-09-20	1	20	20	30	1	2016-08-03	1	30	0	9	2016-08-17	2000-01-01	8	2000-01-01	0	8	1	2016-10-26	0	0	5	5	661	0	0	0	2015-09-26	1	1	1	8	3	2015-10-10	2	3	1	0
2016-09-20	BI	CPW	2016	1	1	2016-09-20	1	35	35	27	2	2016-08-03	3	35	0	9	2016-08-17	2016-08-01	1	2016-08-03	0	8	1	2016-10-26	0	2	2	4	150	0	0	0	2015-10-15	1	1	1	7	6	2015-10-18	2	3	0	0
2016-09-20	BI	CPW	2016	1	0	2016-09-20	1	25	25	27	2	2016-08-29	3	34	0	9	2016-08-31	2000-01-01	8	2000-01-01	0	8	1	2016-10-27	1	1	4	4	500	0	0	0	2015-11-15	1	1	1	8	3	2015-11-20	2	3	0	0
2016-10-19	BI	CPW	2016	1	1	2016-10-17	1	20	20	55	1	2016-09-08	1	35	9	9	2016-09-23	2016-09-07	1	2016-09-08	0	8	1	2016-10-26	0	0	5	5	661	0	0	0	2015-09-26	1	1	1	8	3	2015-10-10	2	3	1	0
2016-06-10	BI	CPW	2016	1	1	2016-10-17	1	15	15	60	1	2016-09-23	1	40	9	9	2016-09-28	2016-09-10	1	2016-09-23	0	8	1	2016-11-27	0	0	3	3	107	0	1	0	2016-03-15	1	1	1	7	2	2016-03-18	2	3	0	0
2016-10-19	BI	CPW	2016	1	0	2016-10-17	1	40	40	50	1	2016-09-19	3	45	0	9	2016-09-23	2000-01-01	8	2000-01-01	0	8	1	2016-11-27	0	0	4	4	187	1	0	0	2015-09-22	1	1	1	8	7	2016-09-25	1	2	1	0
2016-10-17	BI	CPW	2016	1	1	2016-10-17	1	40	40	61	1	2016-09-06	1	45	0	9	2016-09-14	2016-09-02	1	2016-09-06	0	8	1	2016-11-26	1	1	4	4	545	0	0	0	2016-06-14	1	1	1	8	2	2016-06-16	1	2	0	0
2016-10-17	BI	CPW	2016	1	1	2016-10-17	1	40	40	55	2	2016-09-14	1	40	0	9	2016-09-26	2016-09-09	1	2016-09-14	0	8	1	2016-11-26	0	0	4	4	1000	0	0	0	2016-03-28	1	1	1	7	4	2016-04-01	2	3	0	0
2016-10-17	BI	CPW	2016	1	1	2016-10-17	1	35	35	16	1	2016-09-24	1	35	0	9	2016-09-26	2016-09-16	1	2016-09-24	0	8	1	2016-11-26	4	4	4	4	1100	1	1	0	2016-04-15	1	0	1	8	1	2016-09-24	1	1	0	0
2016-11-16	BI	CPW	2016	1	1	2016-11-15	1	25	25	25	2	2016-08-29	1	38	9	9	2016-10-05	2016-08-27	1	2016-08-27	0	8	1	2017-04-25	0	0	2	4	800	0	0	0	2016-07-30	1	0	0	7	0	2016-08-29	0	0	0	0
2016-12-27	BI	CPW	2016	1	0	2016-12-16	1	7	7	35	2	2016-11-01	1	40	0	9	2016-11-04	2000-01-01	8	2000-01-01	0	8	1	2017-01-26	0	1	2	8	562	1	0	0	2016-01-16	1	0	1	6	2	2016-01-20	1	2	0	0
2016-12-27	BI	CPW	2016	1	1	2016-12-16	1	20	12	60	2	2016-11-15	1	39	9	9	2016-11-18	2016-11-11	1	2016-11-15	0	8	1	2017-01-25	0	0	2	5	150	0	0	9	2015-06-12	0	1	1	7	2	2015-06-12	1	2	0	0
2016-12-27	BI	CPW	2016	1	1	2016-12-16	1	20	12	55	1	2016-11-22	0	35	9	9	2016-11-30	2016-11-18	1	2016-11-22	0	8	1	2017-01-25	0	0	3	4	750	0	0	0	2016-06-15	1	9	9	9	99	1800-01-01	9	9	9	9
2016-12-27	BI	CPW	2016	1	0	2016-12-16	1	25	25	35	1	2016-11-05	1	99	9	9	2016-11-25	2000-01-01	8	2000-01-01	0	8	1	2017-01-25	1	1	4	4	437	0	0	0	2015-11-15	1	1	1	8	3	2016-03-15	1	2	1	0
2016-12-27	BI	CPW	2016	1	0	2016-12-16	1	20	25	50	1	2016-11-15	0	36	0	9	2016-11-25	2000-01-01	8	2000-01-01	0	8	1	2017-04-24	3	3	3	3	500	0	0	0	2016-07-15	1	0	1	8	3	2016-07-18	2	3	1	0
2016-12-27	BI	CPW	2016	1	1	2016-12-16	1	25	25	60	2	2016-11-15	0	25	0	9	2016-11-30	2016-11-06	1	2016-11-15	0	8	1	2017-01-25	0	0	2	4	200	1	1	0	2016-07-15	1	1	1	7	2	2016-07-20	1	1	0	1
2017-01-30	BI	CPW	2016	1	1	2017-01-30	1	35	35	55	1	2016-11-24	1	99	9	9	2016-12-02	2016-11-21	1	2016-11-24	0	8	1	2017-04-24	0	0	3	3	625	0	0	0	2015-11-15	1	0	1	7	6	2016-05-15	2	3	0	0
2016-12-27	BI	CPW	2016	1	1	2016-12-16	1	20	20	16	1	2016-10-19	1	35	9	9	2016-11-09	2016-10-16	1	2016-10-19	0	8	1	2017-01-25	0	0	3	5	240	0	0	0	2016-08-18	1	1	1	7	2	2016-08-20	1	2	0	0
2017-01-30	BI	CPW	2016	1	1	2017-01-30	1	35	35	30	2	2016-12-24	1	99	9	9	2016-12-26	2016-11-01	1	2016-12-24	0	8	1	2017-04-24	2	0	2	4	667	0	0	0	2016-01-15	1	0	1	7	20	2016-12-15	2	3	0	0
2017-01-30	BI	CPW	2016	1	1	2017-01-30	1	17	17	40	1	2016-12-15	0	99	9	9	2016-12-26	2016-12-02	1	2016-12-15	0	8	1	2017-04-25	3	3	4	4	400	0	0	0	2016-10-15	1	0	1	7	4	2016-10-25	2	3	0	0
2017-01-30	BI	CPW	2016	1	1	2017-01-30	1	15	15	50	1	2016-12-20	0	99	9	9	2016-12-26	2016-12-18	1	2016-12-20	0	8	1	2017-04-25	0	0	2	4	1000	1	1	0	2016-11-07	1	1	1	7	1	2016-11-15	2	3	0	0
2017-02-23	BI	CPW	2017	1	1	2017-02-18	1	35	35	40	1	2017-01-11	1	99	9	9	2017-01-23	2017-01-03	1	2017-01-11	0	8	1	2017-04-24	0	0	2	4	1000	1	1	0	2016-12-15	1	0	1	7	1	2016-12-28	2	3	0	0
2016-06-13	BI	CPW	2016	1	1	2016-06-13	1	10	10	45	2	2016-05-09	9	99	9	9	2016-05-16	2016-05-02	1	2016-05-09	0	8	1	2016-12-06	1	1	2	5	700	0	0	0	2016-04-15	0	1	1	7	3	1800-01-01	2	3	0	0
2016-07-18	BI	CPW	2016	1	0	2016-07-18	1	18	18	40	1	2016-06-02	1	39	9	9	2016-06-06	2000-01-01	8	2000-01-01	0	8	1	2016-08-26	1	0	6	0	300	0	0	0	2016-02-15	1	1	1	8	2	2016-02-20	1	2	1	1
2016-07-18	BI	CPW	2016	1	1	2016-07-18	1	14	14	60	1	2016-06-04	1	99	9	9	2016-06-10	2016-06-02	1	2016-06-04	0	8	1	2016-08-26	0	0	4	4	222	0	0	0	2016-03-03	0	0	1	7	1	2016-06-04	1	1	1	0
2016-07-18	BI	CPW	2016	1	0	2016-07-18	1	10	10	40	2	2016-06-04	1	38	9	9	2016-06-10	2000-01-01	8	2000-01-01	0	8	1	2016-08-26	0	0	3	7	272	1	0	0	2016-04-15	1	1	1	8	3	2016-04-20	2	3	0	0
2016-07-18	BI	CPW	2016	1	0	2016-07-18	1	10	10	25	2	2016-06-07	1	34	9	9	2016-06-13	2000-01-01	8	2000-01-01	0	8	1	2016-08-26	0	0	4	4	171	0	0	0	2016-02-18	1	1	1	4	1	2016-06-07	1	1	1	0
2016-07-18	BI	CPW	2016	1	0	2016-07-18	1	15	15	30	1	2016-06-18	1	33	9	9	2016-06-22	2000-01-01	8	2000-01-01	0	8	1	2016-08-26	0	0	4	4	888	0	0	0	2015-08-21	1	0	1	8	5	2015-09-01	2	3	0	0
2016-07-06	BI	CPW	2016	1	1	2016-08-23	1	15	15	53	2	2016-07-02	1	31	9	9	2016-07-06	2016-07-02	1	2016-07-02	0	8	1	2016-09-14	0	0	2	3	150	0	0	0	2016-06-15	1	1	1	7	1	2016-07-02	1	1	0	0
2016-08-23	BI	CPW	2016	1	0	2016-08-23	1	8	8	40	2	2016-07-09	3	38	9	9	2016-07-18	2000-01-01	8	2000-01-01	0	8	1	2016-09-14	0	0	4	4	300	0	0	0	2016-06-18	1	0	1	1	2	2016-07-08	1	1	0	0
2016-09-20	BI	CPW	2016	1	1	2016-09-12	1	99	10	35	1	2016-08-05	1	34	9	9	2016-08-08	2016-08-05	1	2016-08-05	0	8	1	2016-10-24	0	0	8	8	1000	0	0	9	2016-08-05	1	0	1	7	1	2016-08-05	1	9	1	0
2016-09-20	BI	CPW	2016	1	0	2016-09-12	1	99	2	17	1	2016-08-16	1	30	9	9	2016-08-20	2000-01-01	8	2000-01-01	0	8	1	2016-10-25	4	5	1	8	2500	0	0	9	2016-07-15	1	0	1	8	3	2016-07-17	1	2	0	0
2016-09-20	BI	CPW	2016	1	0	2016-09-12	1	99	12	28	1	2016-08-17	1	33	9	9	2016-08-23	2000-01-01	8	2000-01-01	0	8	1	2016-10-25	0	2	5	5	266	0	0	0	2016-08-05	1	0	1	8	1	2016-08-06	1	1	0	0
2016-09-20	BI	CPW	2016	1	0	2016-09-12	1	10	10	22	1	2016-08-24	1	32	9	9	2016-08-28	2000-01-01	8	2000-01-01	0	8	1	2016-10-25	1	1	4	4	262	0	0	9	2016-08-12	1	1	1	8	1	2016-08-19	1	1	1	0
2016-10-19	BI	CPW	2016	1	0	2016-10-17	1	5	5	35	1	2016-09-07	3	31	9	9	2016-09-13	2000-01-01	8	2000-01-01	0	8	1	2016-11-26	0	0	3	3	400	0	0	0	2016-03-15	1	1	1	8	2	2016-06-05	1	2	1	0
2016-10-19	BI	CPW	2016	1	1	2016-10-17	1	12	12	42	2	2016-09-08	1	35	9	9	2016-09-12	2016-09-03	1	2016-09-08	0	8	1	2016-11-26	0	0	4	4	1635	0	0	0	2016-01-15	1	1	1	7	2	2016-01-16	2	3	0	0
2016-11-15	BI	CPW	2016	1	1	2016-11-15	1	18	18	15	1	2016-10-03	9	30	9	9	2016-10-14	2016-10-03	1	2016-10-03	0	8	1	2016-12-06	2	0	2	4	600	0	0	0	2016-03-30	0	0	1	9	2	2016-04-13	1	2	0	0
2016-11-16	BI	CPW	2016	1	1	2016-11-15	1	18	18	62	2	2016-10-04	1	99	9	9	2016-10-14	2016-10-04	1	2016-10-04	0	8	1	2016-12-06	0	0	2	4	550	0	0	0	2016-02-10	0	1	0	7	2	2016-02-15	1	2	0	1
2016-11-16	BI	CPW	2016	1	1	2016-11-15	1	18	18	65	2	2016-10-04	2	99	9	9	2016-10-14	2016-10-04	1	2016-10-04	0	8	1	2016-12-06	0	3	5	4	800	1	0	0	2016-08-25	1	0	1	7	1	2016-08-25	1	2	0	1
2016-11-16	BI	CPW	2016	1	0	2016-11-15	1	10	10	59	1	2016-12-15	1	31	9	9	2016-10-14	2000-01-01	8	2000-01-01	0	8	1	2016-12-06	1	1	5	5	750	0	0	0	2016-10-04	1	0	1	9	3	2017-01-10	1	2	0	0
2016-12-27	BI	CPW	2016	1	1	2016-12-16	1	10	10	34	2	2016-11-07	1	36	9	9	2016-11-11	2016-11-05	1	2016-11-07	0	8	1	2017-01-24	5	3	6	5	1363	0	0	0	2016-11-04	1	1	1	7	0	2016-11-07	0	0	0	0
2016-12-27	BI	CPW	2016	1	1	2016-12-16	1	10	10	23	2	2016-11-08	0	33	9	9	2016-11-11	2016-11-01	1	2016-11-08	0	8	1	2017-01-24	5	0	6	5	4000	0	0	0	2016-09-15	1	0	1	7	5	2016-10-01	2	3	0	0
2016-12-27	BI	CPW	2016	1	1	2016-12-16	1	10	10	28	2	2016-11-09	1	32	9	9	2016-11-11	2016-11-07	1	2016-11-09	0	8	1	2017-01-24	0	1	4	4	875	0	0	0	2016-11-04	0	1	1	7	1	2016-11-09	1	1	0	0
2016-12-27	BI	CPW	2016	1	0	2016-12-16	1	5	5	60	1	2016-11-28	2	35	9	9	2016-11-30	2000-01-01	8	2000-01-01	0	8	1	2017-01-24	0	0	5	5	208	0	0	0	2016-10-15	1	0	1	4	2	2016-11-27	2	3	1	0
2016-12-27	BI	CPW	2016	1	0	2016-12-16	1	5	5	60	1	2016-11-30	2	45	9	9	2016-12-02	2000-01-01	8	2000-01-01	0	8	1	2017-01-24	0	2	2	4	500	0	0	0	2016-06-15	0	0	1	1	2	2016-06-22	1	2	0	0
2016-04-22	BI	CPW	2016	1	0	2016-08-23	1	999	12	15	1	2016-03-14	3	50	0	9	2016-03-16	2000-01-01	8	2000-01-01	0	8	1	2016-05-18	3	1	1	1	4500	0	0	0	2015-11-15	1	1	1	5	3	2016-03-11	1	2	0	0
2016-04-22	BI	CPW	2016	1	1	2016-08-23	1	999	10	22	1	2016-03-26	2	43	0	9	2016-03-28	2016-03-22	1	2016-03-26	0	8	1	1800-01-01	0	0	3	4	2250	0	0	9	2016-02-11	1	1	1	7	2	2016-03-26	2	3	1	0
2016-04-22	BI	CPW	2016	1	0	2016-08-23	1	999	1	20	1	2016-03-26	0	53	0	9	2016-03-30	2000-01-01	8	2000-01-01	0	8	1	2016-05-18	5	5	1	6	2400	0	0	0	2016-02-25	1	1	9	8	3	2016-03-26	1	1	0	0
2016-04-22	BI	CPW	2016	1	0	2016-04-22	1	999	10	17	1	2016-03-21	2	99	9	9	2016-03-30	2000-01-01	8	2000-01-01	0	8	1	2016-05-20	3	3	1	9	1500	0	0	0	2016-02-24	1	0	1	4	3	2016-03-03	1	1	0	0
2016-04-22	BI	CPW	2016	1	1	2016-08-23	1	999	10	58	1	2016-03-28	1	41	0	9	2016-03-30	2016-03-26	1	2016-03-28	0	8	1	2016-05-18	1	1	5	5	999999	0	0	0	2016-01-10	1	1	1	7	1	2016-03-28	1	2	0	0
2016-04-27	BI	CPW	2016	1	1	2016-08-23	1	999	17	55	1	2016-03-08	0	41	0	9	2016-03-30	2016-03-05	1	2016-03-08	0	8	1	1800-01-01	0	0	5	5	999999	0	0	9	2016-02-15	1	1	1	7	1	2016-03-03	2	3	9	9
2016-06-13	BI	CPW	2016	1	1	2016-06-13	1	20	20	60	1	2016-04-18	1	99	9	9	2016-05-06	2016-04-14	1	2016-04-14	0	8	1	2016-12-08	0	0	4	4	467	1	1	0	2016-01-15	1	1	1	7	3	2016-01-15	2	3	0	0
2016-06-13	BI	CPW	2016	1	0	2016-06-13	1	20	20	15	1	2016-05-02	0	99	9	9	2016-05-09	2000-01-01	8	2000-01-01	0	8	1	2016-12-08	2	0	4	4	500	0	0	0	2016-04-20	1	1	1	3	2	2016-04-25	2	3	0	0
2016-06-13	BI	CPW	2016	1	0	2016-06-13	1	20	20	60	1	2016-05-05	2	99	9	9	2016-05-10	2000-01-01	8	2000-01-01	0	8	1	2016-12-08	0	0	3	4	778	0	0	0	2014-12-15	1	0	1	9	2	2014-12-15	1	2	1	0
2016-08-24	BI	CPW	2016	1	0	2016-08-24	1	999	15	36	1	2016-06-30	2	99	9	9	2016-07-01	2000-01-01	8	2000-01-01	0	8	1	2016-09-16	3	3	4	4	150	0	0	0	2016-03-18	1	1	1	5	4	2016-03-20	2	3	1	0
2016-08-24	BI	CPW	2016	1	0	2016-08-24	1	999	10	62	1	2016-07-01	2	99	9	9	2016-07-04	2000-01-01	8	2000-01-01	0	8	1	2016-09-16	0	0	3	3	454	0	0	0	2016-04-18	1	0	1	5	5	2016-04-20	1	2	0	1
2016-08-24	BI	CPW	2016	1	1	2016-08-24	1	999	12	62	1	2016-07-14	2	99	9	9	2016-07-15	2016-07-08	1	2016-07-14	0	8	1	2016-09-16	2	2	4	3	187	0	0	0	2016-03-15	1	0	1	7	2	2016-03-18	1	2	0	1
2016-10-17	BI	CPW	2016	1	0	2016-10-17	1	20	20	60	2	2016-09-28	2	99	9	9	2016-09-28	2000-01-01	8	2000-01-01	0	8	1	2016-11-28	0	5	2	6	2222	0	0	0	2016-09-27	0	1	1	8	2	2016-09-27	1	2	0	0
2017-02-23	BI	CPW	2017	1	0	2017-02-18	1	17	17	15	2	2017-01-17	2	99	9	9	2017-02-04	2000-01-01	8	2000-01-01	0	8	1	2017-04-28	2	0	1	4	250	1	0	9	2016-12-10	1	0	0	4	3	2016-12-15	2	3	0	0
2016-04-22	BI	CPW	2016	1	1	2016-08-23	1	15	15	45	1	2016-03-25	0	43	9	9	2016-03-30	2016-03-22	1	2016-03-25	0	8	1	2016-05-19	2	2	4	4	400	0	0	0	1800-01-01	2	2	2	7	99	2016-03-23	9	4	1	1
2016-04-22	BI	CPW	2016	1	1	2016-08-23	1	999	15	40	1	2016-03-23	3	45	9	9	2016-03-31	2016-03-05	1	2016-03-23	0	8	1	2016-05-19	0	0	4	4	4000	0	0	0	2016-02-15	1	9	9	9	99	1800-01-01	9	9	9	9
2016-04-22	BI	CPW	2016	1	0	2016-08-23	1	999	12	50	1	2016-03-28	3	42	9	9	2016-03-31	2000-01-01	8	2000-01-01	0	8	1	2016-05-19	0	0	4	4	1000	0	0	0	2015-10-15	1	2	1	4	3	2016-03-28	1	1	9	9
2016-07-19	BI	JMI	2016	1	1	2016-07-19	1	6	6	65	2	2016-06-16	1	99	9	9	2016-06-17	2016-05-18	1	2016-06-16	0	8	1	2016-08-30	0	0	2	4	500	1	0	0	2015-12-15	1	1	1	7	2	2015-12-20	1	2	9	9
2016-07-19	BI	JMI	2016	1	1	2016-07-19	1	6	6	30	1	2016-06-28	2	99	9	9	2016-06-29	1800-01-01	1	2016-06-28	0	8	1	2016-12-05	3	3	4	4	1000	0	0	0	2016-05-25	0	0	1	7	0	2016-06-28	0	0	0	0
2016-10-14	BI	JMI	2016	1	1	2016-10-14	1	10	10	60	1	2016-09-03	2	99	0	9	2016-09-05	2016-08-28	2	1800-01-01	0	8	1	2016-11-24	0	0	3	3	75	0	0	0	2016-05-15	1	1	1	7	3	2016-06-02	2	3	0	0
2016-07-19	BI	JMI	2016	1	0	2016-07-19	1	7	7	37	1	2016-06-16	1	48	9	9	2016-06-18	2000-01-01	8	2000-01-01	0	8	1	2016-08-30	2	2	4	4	300	0	0	0	2016-03-15	1	0	1	6	4	2016-03-20	2	3	1	0
2016-12-24	BI	JMI	2016	1	0	2016-12-24	1	10	10	27	2	2016-11-29	1	99	0	9	2016-11-30	2000-01-01	8	2000-01-01	0	8	1	2017-01-12	3	5	2	4	100	0	0	0	2016-11-15	0	0	1	4	1	2016-11-18	1	1	0	0
2016-12-24	BI	JMI	2016	1	1	2016-12-24	1	5	5	20	1	2016-11-29	3	22	0	9	2016-12-10	2016-11-25	2	2016-11-28	0	8	1	2017-01-12	9	9	0	0	999999	0	0	0	1800-01-01	0	9	0	7	3	2016-06-21	1	2	0	0
2017-01-24	BI	JMI	2016	1	1	2017-01-24	1	6	6	65	1	2016-12-22	1	40	0	9	2016-12-28	2016-12-20	2	1800-01-01	0	8	1	2017-02-10	0	0	5	5	160	0	0	0	2016-09-08	1	0	1	7	1	2016-12-22	1	1	0	0
2016-06-18	BI	JMI	2016	1	0	2016-06-18	1	8	8	85	1	2016-05-05	3	39	9	9	2016-05-11	2000-01-01	8	2000-01-01	0	8	1	2016-06-22	0	0	0	0	1250	9	0	0	2016-03-15	1	0	1	4	2	2016-03-28	1	1	0	1
2016-04-18	BI	JMI	2016	1	0	2016-04-18	1	10	10	25	1	2016-03-04	3	99	9	9	2016-03-05	2000-01-01	8	2000-01-01	0	8	1	2016-05-26	0	0	4	4	1714	0	0	0	2015-11-20	1	0	1	8	1	2016-03-04	1	1	1	0
2016-04-18	BI	JMI	2016	1	1	2016-04-18	1	15	15	26	2	2016-03-11	1	99	9	9	2016-03-12	2016-03-04	9	2016-03-11	0	8	1	2016-05-26	0	0	2	5	222	0	0	0	2015-12-15	0	0	0	7	2	2016-01-10	1	2	0	0
2016-04-18	BI	JMI	2016	1	1	2016-04-18	1	12	12	60	1	2016-03-11	0	99	9	9	2016-03-15	2016-02-10	9	2016-03-09	0	8	1	2016-05-26	0	0	3	3	333	0	0	0	2016-01-15	1	0	1	7	2	2016-01-17	2	3	0	0
2016-04-18	BI	JMI	2016	1	1	2016-04-18	1	12	12	70	1	2016-03-17	0	99	9	9	2016-03-19	2016-03-13	2	2016-03-17	0	8	1	2016-05-26	0	1	4	4	150	0	0	9	2015-08-15	1	0	1	7	1	2016-03-17	0	0	0	0
2016-04-18	BI	JMI	2016	1	1	2016-04-18	1	10	10	65	1	2016-03-18	1	99	9	9	2016-03-19	2016-03-06	1	2016-03-18	0	8	1	2016-05-26	0	0	5	5	1200	0	0	0	2015-10-15	1	1	1	7	1	2016-03-19	9	9	1	1
2016-04-18	BI	JMI	2016	1	1	2016-04-18	1	10	10	55	1	2016-03-19	2	99	9	9	2016-03-22	2016-03-14	9	2016-03-19	0	8	1	2016-05-28	0	0	3	3	675	0	0	9	2015-12-30	0	0	1	7	2	2016-01-11	1	2	1	1
2016-05-18	BI	JMI	2016	1	1	2016-05-18	1	6	6	28	2	2016-04-11	1	99	0	9	2016-04-12	2016-02-20	2	1800-01-01	0	8	1	2016-06-22	5	4	2	5	714	0	0	0	2014-11-10	1	0	1	7	4	2014-11-16	1	2	0	0
2016-08-17	BI	JMI	2016	1	0	2016-08-17	1	7	7	20	1	2016-07-27	1	47	9	9	2016-07-28	2000-01-01	8	2000-01-01	0	8	1	2016-09-23	0	0	4	4	285	0	0	0	2016-05-15	9	1	1	3	2	2016-07-17	2	3	0	0
2016-08-17	BI	JMI	2016	1	1	2016-08-17	1	6	6	58	1	2016-07-30	2	45	9	9	2016-08-02	1800-01-01	9	2016-07-30	0	8	1	2016-09-23	0	0	4	4	300	0	0	0	2016-06-15	0	0	0	7	1	2016-07-30	1	1	1	0
2016-11-19	BI	JMI	2016	1	0	2016-11-19	1	8	8	26	1	2016-10-26	2	99	0	9	2016-10-27	2000-01-01	8	2000-01-01	0	8	1	2016-12-06	1	1	5	5	600	0	0	0	2016-10-18	0	1	1	8	1	2016-10-26	1	1	0	0
2016-11-19	BI	JMI	2016	1	1	2016-11-19	1	8	8	29	2	2016-10-18	0	28	0	9	2016-11-17	2016-10-15	2	2016-10-17	0	8	1	2016-12-06	0	0	2	4	500	0	0	0	2016-10-10	0	0	0	3	1	2016-10-18	2	3	0	0
2017-01-24	BI	JMI	2016	1	0	2017-01-24	1	8	8	18	1	2016-12-02	1	45	0	9	2016-12-03	2000-01-01	8	2000-01-01	0	8	1	2017-02-10	0	0	4	2	1200	1	0	0	2016-10-15	1	1	1	8	2	2016-10-18	1	2	1	1
2017-01-24	BI	JMI	2016	1	0	2017-01-24	1	8	8	70	1	2016-12-06	1	38	0	9	2016-12-08	2000-01-01	8	2000-01-01	0	8	1	2017-02-10	0	3	3	5	166	0	0	0	2016-08-15	1	0	1	4	3	2016-08-21	1	2	0	0
2017-01-24	BI	JMI	2016	1	0	2017-01-24	1	12	12	30	1	2016-12-27	3	49	0	9	2016-12-29	2000-01-01	8	2000-01-01	0	8	1	2017-02-10	1	0	4	2	147	0	0	0	2016-07-15	1	0	1	3	5	2016-07-20	2	3	1	0
2017-02-16	BI	JMI	2017	1	1	2017-02-16	1	10	10	38	1	2017-01-11	1	42	0	9	2017-01-12	1800-01-01	9	1800-01-01	0	8	1	2017-04-19	0	0	4	4	285	0	0	0	2016-11-15	1	0	1	7	2	2016-11-20	2	3	0	0
2017-02-16	BI	JMI	2017	1	0	2017-02-16	1	10	10	30	1	2017-01-25	2	38	0	9	2017-01-28	2000-01-01	8	2000-01-01	0	8	1	2017-04-20	0	0	4	4	800	0	0	0	2016-06-15	1	1	1	1	2	2016-06-20	1	2	1	1
2017-02-16	BI	JMI	2017	1	0	2017-02-16	1	8	8	45	2	2017-01-30	1	40	0	9	2017-01-31	2000-01-01	8	2000-01-01	0	8	1	2017-04-20	0	0	2	4	400	0	0	0	2016-07-15	1	0	1	8	3	2016-07-22	1	2	0	0
2016-04-19	BI	JMI	2016	1	0	2016-04-19	1	10	10	55	2	2016-03-15	1	99	9	9	2016-03-16	2000-01-01	8	2000-01-01	0	8	1	2016-05-25	0	4	2	4	800	0	0	0	2015-02-20	1	1	1	7	5	2015-02-25	1	2	0	0
2016-04-19	BI	JMI	2016	1	0	2016-04-19	1	2	2	17	1	2016-03-21	1	99	9	9	2016-03-23	2000-01-01	8	2000-01-01	0	8	1	2016-05-25	3	0	9	9	1500	1	0	0	2016-02-13	1	1	1	1	2	2016-02-22	2	3	0	1
2016-07-16	BI	JMI	2016	1	1	2016-07-16	1	7	7	55	1	2016-06-15	1	99	9	9	2016-06-17	2016-06-07	2	2016-06-15	0	8	1	2016-08-31	0	0	4	4	750	0	0	0	2016-06-12	1	1	1	8	1	2016-06-15	1	1	1	0
2016-07-18	BI	JMI	2016	1	1	2016-07-18	1	10	10	35	1	2016-06-06	1	45	9	9	2016-06-08	2016-06-02	2	2016-06-06	0	8	1	2016-08-29	0	0	4	4	285	0	0	0	2016-05-15	1	1	1	8	2	2016-05-17	2	3	1	0
2017-02-16	BI	JMI	2017	1	1	2017-02-16	1	8	8	60	1	2017-01-17	1	34	0	9	2017-01-19	1800-01-01	9	1800-01-01	0	8	1	2017-04-19	0	0	4	4	800	0	0	0	2016-10-15	1	1	1	7	0	2017-01-17	0	0	1	0
2017-02-16	BI	JMI	2017	1	0	2017-02-16	1	7	7	24	2	2017-01-14	2	38	0	0	2017-01-16	2000-01-01	8	2000-01-01	0	8	1	2017-04-19	0	0	2	4	166	1	0	0	2016-11-15	1	0	1	8	2	2016-11-17	2	3	0	0
2017-02-16	BI	JMI	2017	1	0	2017-02-16	1	3	3	35	1	2017-01-18	1	41	0	0	2017-01-20	2000-01-01	8	2000-01-01	0	8	1	2017-04-19	2	2	6	6	1000	0	0	0	2016-01-18	1	0	1	1	3	2016-01-22	2	3	1	1
2016-04-27	BI	MZF	2016	1	0	2016-04-27	1	21	12	52	2	2016-03-26	1	99	9	9	2016-03-30	2000-01-01	8	2000-01-01	0	8	1	2016-06-17	0	1	2	2	428	0	0	9	2015-04-15	1	0	1	8	5	2015-04-20	2	3	0	0
2016-06-04	BI	MZF	2016	1	0	2016-06-04	1	10	12	18	1	2016-04-21	2	99	9	9	2016-04-22	2000-01-01	8	2000-01-01	0	8	1	2016-07-04	3	0	3	4	1125	9	9	0	2016-03-21	1	0	1	8	3	2016-03-25	2	3	0	0
2016-06-04	BI	MZF	2016	1	0	2016-06-04	1	12	12	35	1	2016-04-04	3	99	9	9	2016-04-22	2000-01-01	8	2000-01-01	0	8	1	2016-07-04	2	2	4	4	1713	1	0	0	2015-10-20	1	1	1	8	2	2015-10-27	2	3	1	1
2016-06-04	BI	MZF	2016	1	1	2016-06-04	1	8	10	15	2	2016-04-25	1	99	9	9	2016-04-27	2016-04-23	1	1800-01-01	0	8	1	2016-07-04	2	0	2	4	212	0	1	0	2016-01-15	1	1	1	7	4	2016-01-23	2	3	0	0
2016-04-25	BI	MZF	2016	1	1	2016-04-25	1	12	12	62	1	2016-03-04	1	99	9	9	2016-03-07	2016-06-11	2	1800-01-01	0	8	1	2016-06-18	0	0	3	3	600	0	0	0	2015-10-30	0	0	1	1	2	2015-11-12	2	3	1	0
2016-04-25	BI	MZF	2016	1	1	2016-04-25	1	12	12	40	2	2016-03-03	1	99	0	9	2016-03-07	2016-06-13	2	1800-01-01	0	8	1	2016-06-18	0	2	7	4	250	0	1	0	2015-12-15	1	0	1	8	2	2015-12-17	2	3	0	1
2016-04-25	BI	MZF	2016	1	1	2016-04-25	1	15	15	17	2	2016-03-05	2	99	9	9	2016-03-09	2016-08-20	2	1800-01-01	0	8	1	2016-06-18	3	0	1	4	600	1	0	0	2015-12-20	1	1	1	4	4	2015-12-22	2	3	0	0
2016-04-25	BI	MZF	2016	1	1	2016-04-25	1	16	16	25	1	2016-01-30	3	99	9	9	2016-03-11	2016-01-12	2	1800-01-01	0	8	1	2016-06-18	3	0	4	4	1500	0	0	0	2016-01-10	1	0	1	4	1	2016-01-30	1	1	0	0
2016-10-20	BI	MZF	2016	1	1	2016-11-15	1	11	11	35	1	2016-07-16	9	99	0	9	2016-07-18	2016-07-13	2	2016-07-13	0	8	1	2016-11-20	0	0	4	4	142	0	0	0	2016-05-15	1	0	1	6	3	2016-05-20	2	3	0	0
2016-10-20	BI	MZF	2016	1	1	2016-11-15	1	11	11	15	2	2016-07-16	9	99	0	9	2016-07-15	2016-07-13	2	2016-07-13	0	8	1	2016-11-20	3	0	1	4	142	1	0	0	2016-05-15	1	0	1	6	3	2016-05-20	2	3	0	0
2016-07-21	BI	MZF	2016	1	0	2016-07-27	1	12	12	65	1	2016-06-13	1	99	9	9	2016-06-15	2000-01-01	8	2000-01-01	0	8	1	2016-08-24	3	3	4	4	1250	1	0	0	2016-02-15	1	1	1	4	1	2016-06-13	1	1	1	1
2016-04-21	BI	MZF	2016	1	0	2016-04-21	1	15	9	50	1	2016-02-17	2	99	0	9	2016-03-02	2000-01-01	8	2000-01-01	0	8	1	2016-06-17	0	0	3	3	250	0	0	0	2015-02-20	1	0	1	8	2	2016-02-17	1	1	1	0
2016-04-21	BI	MZF	2016	1	0	2016-04-21	1	16	10	24	1	2016-03-07	1	99	0	9	2016-03-11	2000-01-01	8	2000-01-01	0	8	1	2016-06-17	5	4	7	5	1800	1	0	9	2016-01-30	1	0	1	5	2	2016-01-30	1	2	0	1
2016-04-21	BI	MZF	2016	1	1	2016-04-21	1	10	10	25	1	2016-03-16	3	99	0	9	2016-03-18	1800-01-01	2	1800-01-01	0	8	1	2016-06-18	0	0	4	3	1200	0	0	0	2015-03-20	1	1	1	8	3	2015-03-28	1	2	1	1
2016-04-21	BI	MZF	2016	1	1	2016-04-21	1	19	11	20	2	2016-02-25	2	99	0	9	2016-03-02	2016-07-20	2	2016-07-24	0	8	1	2016-06-18	3	0	2	4	750	1	1	0	2016-01-10	1	0	1	8	1	2016-01-12	2	3	0	0
2016-04-21	BI	MZF	2016	1	0	2016-04-21	1	20	10	22	1	2016-03-06	3	99	0	9	2016-03-14	2000-01-01	8	2000-01-01	0	8	1	2016-06-18	0	0	4	0	1875	1	1	0	2016-01-15	1	0	1	1	1	2016-03-06	1	1	0	0
2016-11-16	BI	MZF	2016	1	0	2016-11-15	1	16	16	20	1	2016-08-02	9	99	9	9	2016-08-08	2000-01-01	8	2000-01-01	0	8	1	2016-11-21	1	1	3	5	136	1	0	0	2016-05-15	1	1	1	8	3	2016-05-18	2	3	0	0
2016-10-20	BI	MZF	2016	1	0	2016-11-15	1	11	11	35	2	2016-08-02	9	99	9	9	2016-08-12	2000-01-01	8	2000-01-01	0	8	1	2016-11-21	0	2	2	4	750	0	0	0	2016-02-15	1	0	1	8	3	2016-02-25	2	3	0	0
2016-10-20	BI	MZF	2016	1	1	2016-11-15	1	15	5	32	1	2016-08-29	9	99	9	9	2016-08-29	2016-08-12	1	2016-08-29	0	8	1	2016-11-20	0	0	6	6	833	1	1	0	2016-06-15	1	0	1	8	2	2016-06-17	2	3	1	0
2016-10-20	BI	MZF	2016	1	1	2016-11-15	1	5	5	15	1	2016-09-09	9	99	9	9	2016-09-12	2016-08-20	1	2016-09-09	0	8	1	2016-11-20	3	0	4	4	1250	0	0	0	2016-07-15	1	1	1	7	2	2016-07-18	1	2	0	0
2016-10-20	BI	MZF	2016	1	1	2016-11-15	1	10	7	60	1	2016-09-17	9	99	9	9	2016-09-19	2016-09-08	1	2016-09-17	0	8	1	2016-11-20	0	0	3	3	645	0	0	0	2016-04-15	1	0	1	7	2	2016-04-20	2	3	0	0
2016-10-20	BI	MZF	2016	1	0	2016-11-15	1	15	15	65	1	2016-09-20	9	99	9	9	2016-09-26	2000-01-01	8	2000-01-01	0	8	1	2016-11-21	1	1	3	4	350	0	0	0	2016-03-30	1	0	1	8	2	2016-04-03	1	2	0	0
2016-10-20	BI	MZF	2016	1	1	2016-11-15	1	8	8	50	1	2016-08-17	9	99	9	9	2016-09-26	2016-08-04	1	2016-08-17	0	8	1	2016-11-21	0	0	4	4	357	0	0	0	2016-01-15	1	0	1	8	3	2016-02-05	2	3	1	0
2016-10-20	BI	MZF	2016	1	0	2016-11-15	1	10	10	63	1	2016-09-20	9	99	9	9	2016-09-26	2000-01-01	8	2000-01-01	0	8	1	2016-11-21	0	0	4	4	370	1	0	0	2016-06-30	1	1	1	8	3	2016-07-03	2	3	1	1
2016-12-03	BI	MZF	2016	1	0	2016-12-08	1	7	7	18	2	2016-08-19	1	99	9	9	2016-10-05	2000-01-01	8	2000-01-01	0	8	1	2017-01-07	0	1	2	6	820	0	0	0	2016-05-15	1	0	1	8	2	2016-07-05	1	1	0	0
2016-12-03	BI	MZF	2016	1	0	2016-12-08	1	8	8	65	1	2016-10-21	1	99	9	9	2016-10-26	2000-01-01	8	2000-01-01	0	8	1	2017-01-07	2	2	3	3	450	0	0	0	2016-07-02	0	9	9	9	1	2016-10-21	1	1	9	9
2016-12-03	BI	MZF	2016	1	1	2016-12-08	1	16	7	25	2	2016-10-17	1	99	9	9	2016-10-21	2016-09-13	1	2016-10-17	0	8	1	2017-01-07	0	0	2	4	400	0	0	9	2015-12-17	1	0	1	8	3	2016-02-07	2	3	0	1
2016-12-03	BI	MZF	2016	1	1	2016-12-08	1	16	7	30	2	2016-10-15	2	99	9	9	2016-10-26	2016-09-13	1	2016-10-17	0	8	1	2017-01-07	1	0	2	4	500	0	0	0	2016-03-15	1	1	1	7	2	2016-05-03	1	2	0	0
2016-06-22	CG	MMD	2016	1	0	2016-06-22	1	6	6	27	2	2016-05-06	3	43	0	0	2016-05-06	2000-01-01	8	2000-01-01	0	8	1	2016-06-29	2	0	2	4	1538	0	0	0	2016-03-06	1	0	0	8	4	2016-05-06	1	1	0	0
2016-06-22	CG	MMD	2016	1	1	2016-06-22	1	2	12	60	1	2016-05-14	3	45	0	0	2016-05-16	2016-05-11	1	2016-05-14	0	8	1	2016-06-28	0	0	5	5	1042	0	0	0	2016-04-24	1	1	0	7	0	2016-05-14	0	0	0	0
2016-06-22	CG	MMD	2016	1	0	2016-06-22	0	2	2	18	1	2016-05-19	3	41	0	0	2016-05-23	2000-01-01	8	2000-01-01	0	8	1	2016-06-29	3	0	3	7	1042	0	0	0	2016-04-29	0	0	0	8	2	2016-06-19	1	1	0	0
2016-06-24	CG	MMD	2016	1	1	2016-06-24	1	10	10	65	1	2016-06-07	3	44	0	0	2016-06-08	2016-06-02	2	2016-06-02	0	8	1	2016-06-28	2	2	9	9	4000	0	1	0	2016-03-28	1	0	1	7	2	2016-05-29	1	9	0	1
2016-09-15	CG	MMD	2016	1	0	2016-09-16	0	3	3	62	1	2016-08-12	1	35	0	0	2016-08-16	2000-01-01	8	2000-01-01	0	8	1	2016-09-29	2	2	4	4	1580	0	0	0	2016-03-17	0	0	0	6	1	2016-08-11	1	1	0	0
2016-09-15	CG	MMD	2016	1	1	2016-09-16	1	7	10	63	1	2016-08-16	3	38	0	0	2016-08-22	2016-08-07	1	2016-08-16	0	8	1	2016-09-29	2	2	4	4	3000	0	0	0	2016-07-26	0	0	0	7	2	2016-08-14	1	1	0	0
2016-11-23	CG	MMD	2016	1	0	2016-11-25	1	11	11	61	1	2016-10-01	3	45	0	0	2016-10-03	2000-01-01	8	2000-01-01	0	8	1	2016-12-14	1	1	5	5	500	0	0	0	2016-05-16	0	0	1	7	1	2016-09-15	1	1	0	0
2016-11-23	CG	MMD	2016	1	0	2016-11-25	0	3	3	21	1	2016-10-04	2	48	0	0	2016-10-06	2000-01-01	8	2000-01-01	0	8	1	2016-12-14	2	2	8	8	5000	0	0	0	2016-09-15	0	0	0	7	2	2016-09-30	1	1	0	0
2016-11-23	CG	MMD	2016	1	1	2016-11-25	1	5	5	60	1	2016-10-06	0	45	0	0	2016-10-07	2016-10-01	1	2016-10-06	0	8	1	2016-12-13	0	0	5	5	1500	0	0	0	2016-09-15	0	1	0	7	99	2016-10-05	1	1	0	0
2016-11-23	CG	MMD	2016	1	0	2016-11-25	1	7	7	35	1	2016-10-08	3	47	0	0	2016-10-13	2000-01-01	8	2000-01-01	0	8	1	2016-12-15	1	1	4	4	2000	0	0	0	2016-09-08	0	0	0	8	1	2016-10-07	1	1	0	0
2016-11-23	CG	MMD	2016	1	0	2016-11-25	1	7	12	32	1	2016-10-21	2	45	0	0	2016-10-21	2000-01-01	8	2000-01-01	0	8	1	2016-12-14	3	0	4	5	500	0	0	0	2016-09-15	0	0	0	7	2	2016-10-16	1	1	0	0
2016-11-23	CG	MMD	2016	1	1	2016-11-25	1	10	10	26	1	2016-10-21	2	49	0	0	2016-10-24	1800-01-01	1	2016-10-21	0	8	1	2016-12-13	2	0	4	6	1800	0	0	0	2016-09-15	1	0	1	7	2	2016-10-16	1	1	0	0
2016-11-23	CG	MMD	2016	1	1	2016-11-25	1	7	7	19	2	2016-10-24	2	43	0	0	2016-10-25	2016-10-19	1	2016-10-24	0	8	1	2016-12-13	5	1	1	6	1000	0	0	0	2016-09-16	0	0	1	7	99	2016-10-20	1	1	0	0
2016-11-23	CG	MMD	2016	1	1	2016-11-25	1	11	11	30	1	2016-10-28	2	49	0	0	2016-11-02	2016-10-26	1	2016-10-28	0	8	1	2016-12-15	3	3	4	4	1400	0	0	0	2016-08-15	0	0	1	7	99	2016-10-25	1	1	0	0
2017-02-11	CG	MMD	2017	1	0	2017-02-12	1	8	8	27	1	2017-01-06	1	40	0	9	2017-01-06	2000-01-01	8	2000-01-01	0	8	1	2017-02-16	1	0	4	0	100	0	0	0	2016-11-01	0	0	0	1	2	2016-12-15	1	1	1	0
2016-07-21	CG	MMD	2016	1	1	2016-07-22	1	7	7	55	1	2016-06-01	1	50	0	0	2016-06-06	2016-05-14	1	2016-06-01	0	8	1	1800-01-01	0	0	5	5	1500	0	0	0	2016-02-15	0	0	0	7	99	2016-05-14	1	5	0	1
2016-07-21	CG	MMD	2016	1	0	2016-07-22	1	6	6	28	1	2016-06-01	2	40	0	0	2016-06-02	2000-01-01	8	2000-01-01	0	8	1	2016-07-26	2	0	9	4	1500	1	1	0	2016-03-15	0	0	0	2	99	2016-03-15	1	2	1	9
2016-09-15	CG	MMD	2016	1	1	2016-09-16	1	0	5	60	1	2016-08-26	2	37	0	0	2016-08-27	2016-07-19	2	2016-07-19	0	8	1	2016-09-28	1	1	3	3	350	0	0	0	2016-05-26	0	0	0	7	99	2016-08-25	1	1	0	0
2016-09-15	CG	MMD	2016	1	0	2016-09-16	1	5	33	70	1	2016-08-13	3	40	0	0	2016-08-13	2000-01-01	8	2000-01-01	0	8	1	2016-09-28	1	1	5	0	2500	0	0	0	2016-07-29	0	0	0	2	1	2016-08-10	1	1	1	0
2016-12-18	CG	MMD	2016	1	0	2016-12-18	1	8	8	32	1	2016-10-23	0	45	0	0	2016-11-07	2000-01-01	8	2000-01-01	0	8	1	2017-01-19	2	2	3	0	250	0	0	0	2016-10-01	2	0	0	2	1	2016-10-22	1	1	1	0
2016-12-18	CG	MMD	2016	1	0	2016-12-18	1	7	7	70	1	2016-11-11	3	43	0	0	2016-11-11	2000-01-01	8	2000-01-01	0	8	1	2017-01-19	3	3	0	0	1000	0	0	0	2016-11-05	0	0	0	6	2	2016-11-10	1	1	0	0
2016-12-18	CG	MMD	2016	1	1	2016-12-18	1	20	20	70	1	2016-11-19	1	48	0	0	2016-11-23	2016-11-07	1	2016-11-19	0	8	1	2017-01-19	0	0	5	5	1500	0	0	0	2016-11-01	0	0	0	7	1	2016-11-10	1	1	0	0
2016-12-18	CG	MMD	2016	1	1	2016-12-18	1	7	7	45	1	2016-11-26	1	52	0	0	2016-11-30	2016-11-11	1	2016-11-26	0	8	1	2017-01-15	3	0	4	0	400	0	0	0	2016-11-01	2	0	0	7	1	2016-11-14	1	1	1	1
2017-02-11	CG	MMD	2017	1	0	2017-02-14	1	11	11	65	1	2017-01-20	2	99	0	9	2017-01-25	2000-01-01	8	2000-01-01	0	8	1	2017-02-16	2	2	5	5	300	1	1	0	2016-10-01	2	0	0	2	99	2017-01-02	1	1	1	0
2017-02-27	KE	WYD	2017	1	0	2016-12-28	1	4	4	26	2	2016-12-28	3	33	0	0	2017-01-13	2000-01-01	8	2000-01-01	0	8	1	2017-04-20	2	1	4	4	4400	1	0	0	2016-04-12	1	0	1	4	4	2016-11-17	1	1	0	0
2017-02-27	KE	WYD	2017	1	1	2017-02-27	1	7	17	27	1	2017-01-25	3	53	0	0	2017-02-10	2017-01-30	1	2017-01-25	0	8	1	2017-04-20	4	2	4	4	6000	1	0	0	2016-12-24	0	0	0	7	1	2017-01-02	1	1	1	0
2016-08-16	KE	WYD	2016	1	1	2016-09-07	1	7	7	45	2	2016-07-16	3	34	0	0	2016-07-23	2016-07-16	1	2016-07-16	0	8	1	2016-09-22	1	0	4	4	2400	0	0	0	2016-04-29	1	0	1	7	2	2016-05-16	1	1	1	0
2016-08-16	KE	WYD	2016	1	1	2016-09-07	1	1	1	50	1	2016-07-20	3	45	0	0	2016-07-22	2016-07-19	1	2016-07-19	0	8	1	2016-09-21	0	0	4	4	2600	1	0	0	2016-06-24	1	0	1	7	1	2016-06-26	1	1	0	1
2016-08-18	KE	WYD	2016	1	0	2016-09-07	1	7	7	26	1	2016-07-25	0	45	0	0	2016-07-25	2000-01-01	8	2000-01-01	0	8	1	2016-09-22	4	0	4	4	3400	1	0	0	2016-06-30	1	0	1	4	1	2016-07-01	1	1	0	0
2016-08-18	KE	WYD	2016	1	0	2016-09-07	1	15	15	37	1	2016-07-29	3	42	0	0	2016-07-29	2000-01-01	8	2000-01-01	0	8	1	2016-09-21	1	1	4	4	1033	0	0	0	2016-06-13	1	0	1	4	2	2016-06-19	1	5	1	0
2017-02-28	KE	WYD	2017	1	1	2017-02-28	1	5	5	16	2	2017-01-25	2	32	0	0	2017-02-01	2017-01-25	1	2017-01-25	0	8	1	2017-04-21	1	0	1	4	5200	0	0	0	2016-12-25	1	1	1	7	1	2017-01-02	1	1	0	0
2016-06-13	MH	NGC	2016	1	1	2016-06-13	0	3	3	50	2	2016-05-24	1	40	0	9	2016-05-28	2016-05-16	2	2016-05-16	0	8	1	2016-08-11	0	0	4	4	6000	0	0	0	2016-02-23	1	0	1	3	4	2016-04-26	2	3	0	0
2016-08-06	MH	NGC	2016	1	1	2016-08-06	0	3	3	27	1	2016-07-27	1	45	0	0	2016-07-29	2016-07-12	1	2016-07-27	0	8	1	2016-08-30	3	3	8	8	10000	0	0	0	2016-05-30	1	0	1	7	3	2016-05-17	2	3	1	0
2017-02-18	MH	NGC	2017	1	0	2017-04-07	0	3	3	28	1	2017-01-03	1	99	0	9	2017-01-04	2000-01-01	8	2000-01-01	0	8	1	2017-01-02	1	1	8	8	5000	0	0	0	2016-08-15	0	0	1	4	1	2016-12-15	1	1	1	2
2017-02-18	MH	NGC	2017	1	0	2017-04-07	0	5	5	55	1	2017-01-23	3	99	0	9	2017-01-24	2000-01-01	8	2000-01-01	0	8	1	2017-06-09	0	0	3	4	45000	0	0	0	2015-08-15	1	0	1	5	3	2016-12-15	1	2	1	1
2017-03-15	MH	NGC	2017	1	1	2017-03-15	0	4	4	79	1	2017-02-20	2	40	0	9	2017-03-02	2017-02-19	1	2017-02-19	0	8	1	2017-06-08	4	4	4	4	0	0	0	0	2016-12-20	1	0	1	7	1	2016-12-20	1	2	0	0
2017-03-15	MH	NGC	2017	1	1	2017-03-15	0	1.5	5	17	1	2017-01-31	1	45	0	9	2017-02-01	2017-01-23	1	2017-01-24	0	8	1	2017-06-09	3	3	8	8	18000	0	0	0	2016-11-15	1	0	1	7	1	2016-11-15	1	2	1	0
2017-03-15	MH	NGC	2017	1	1	2017-03-15	0	1	4	65	1	2017-02-10	1	50	0	9	2017-02-17	2017-02-08	1	2017-02-08	0	8	1	2017-06-08	0	0	4	4	1250	0	0	0	2016-06-15	1	0	1	7	1	2016-06-15	1	2	0	0
2016-10-05	MH	NVM	2016	1	0	2016-10-05	0	3	6	38	2	2016-08-22	3	99	9	9	1800-01-01	2000-01-01	8	2000-01-01	0	8	1	2016-11-24	0	0	2	4	1500	0	0	0	2016-06-07	1	0	2	5	4	2016-06-02	2	3	0	0
2016-10-05	MH	NVM	2016	1	1	2016-10-05	0	2	5	24	1	2016-08-24	1	99	9	9	2016-09-01	2016-08-24	1	2016-08-24	0	8	1	2016-11-24	4	4	4	2	4000	0	0	0	2016-08-01	1	0	1	5	2	2016-08-01	1	2	0	0
2017-03-09	MH	NVM	2017	1	0	2017-03-03	0	1	1	15	2	2017-01-18	3	30	0	0	2017-01-28	2000-01-01	8	2000-01-01	0	8	1	2017-06-15	4	5	1	6	10000	0	0	0	2016-12-31	1	1	1	3	3	2017-01-03	2	3	0	0
2017-03-09	MH	NVM	2017	1	0	2017-03-03	0	1	1	34	1	2017-01-13	1	44	0	0	2017-02-07	2000-01-01	8	2000-01-01	0	8	1	2017-06-15	3	3	8	8	2000	0	0	0	2017-01-06	1	2	1	5	1	2017-01-03	1	1	0	1
2017-03-09	MH	NVM	2017	1	1	2017-03-03	0	1.5	1.5	19	1	2017-01-25	1	48	0	0	2017-02-07	2017-01-20	1	2017-01-25	0	8	1	2017-06-15	5	5	4	4	3000	0	0	0	2017-01-20	2	2	1	7	0	2017-01-25	0	0	1	1
2017-03-09	MH	NVM	2017	1	0	2017-03-03	0	1	1	45	2	2017-01-26	1	54	0	0	2017-02-14	2000-01-01	8	2000-01-01	0	8	1	2017-06-15	4	4	4	4	1800	0	0	0	2016-12-21	1	1	1	5	3	2016-12-28	1	2	1	0
2017-03-09	MH	NVM	2017	1	0	2017-03-03	0	1.5	1.5	26	2	2017-02-10	2	33	0	0	2017-02-10	2000-01-01	8	2000-01-01	0	8	1	2017-06-15	2	3	3	4	2000	0	0	0	2017-01-15	1	0	1	5	2	2017-01-18	1	2	0	0
2017-03-09	MH	NVM	2017	1	1	2017-03-03	0	1.5	1.5	50	1	2017-02-03	1	47	0	0	2017-02-23	2017-01-27	1	2017-01-27	0	8	1	2017-06-15	4	4	6	6	2000	1	0	0	2017-01-18	1	0	1	7	0	2017-02-03	0	0	1	1
2016-11-21	MH	NVM	2016	1	1	2016-11-21	0	3	6	29	2	2016-10-19	2	46.9	0	9	1800-01-01	1800-01-01	9	2016-11-19	0	8	1	2016-11-24	0	0	2	4	1000	1	1	0	2016-10-05	1	0	1	5	2	2016-10-05	1	2	0	0
2016-06-11	MH	PNR	2016	1	0	2016-06-11	1	12	12	16	1	2016-04-09	1	99	9	9	2016-05-04	2000-01-01	8	2000-01-01	0	8	1	2016-08-11	3	0	1	5	900	0	0	0	2016-03-26	0	0	0	4	1	2016-04-09	1	1	0	0
2016-06-11	MH	PNR	2016	1	1	2016-06-11	1	8	8	26	2	2016-05-04	1	99	9	9	2016-05-04	2016-05-04	1	2016-05-04	0	8	1	2016-08-11	0	0	4	4	999999	0	0	0	2016-03-20	1	0	0	7	1	2016-05-04	1	1	0	0
2016-07-20	MH	PNR	2016	1	0	2016-07-20	1	12	12	24	1	2016-06-01	1	99	0	9	2016-06-03	2000-01-01	8	2000-01-01	0	8	1	2016-09-20	3	0	4	4	3500	0	0	0	2016-05-16	1	1	1	5	2	2016-05-16	1	2	0	0
2016-07-20	MH	PNR	2016	1	1	2016-07-20	0	8	8	28	1	2016-06-06	1	99	0	0	2016-06-10	2016-06-06	1	2016-06-06	0	8	1	2016-09-20	3	0	4	4	2000	0	0	0	2016-07-05	1	0	0	5	2	2016-06-20	1	2	0	0
2016-09-02	MH	PNR	2016	1	1	2016-09-02	1	15	15	32	1	2016-07-14	1	99	9	9	2016-07-14	2016-07-13	1	2016-07-13	0	8	1	2016-09-20	0	0	4	4	6000	0	0	0	2016-07-01	1	1	1	5	3	2016-07-01	1	2	0	0
2016-09-02	MH	PNR	2016	1	0	2016-09-02	0	5	5	16	2	2016-07-22	3	99	9	9	2016-07-22	2000-01-01	8	2000-01-01	0	8	1	2016-09-20	5	0	1	4	2000	0	0	0	2016-06-05	1	0	1	5	4	2016-06-05	2	3	0	0
2016-09-24	MH	PNR	2016	1	1	2016-09-24	1	15	15	22	1	2016-08-20	1	99	9	9	2016-08-20	2016-08-15	1	2016-08-15	0	8	1	2016-10-21	2	0	4	4	2000	0	0	9	2016-08-17	1	0	1	5	2	2016-08-17	1	2	0	0
2016-09-24	MH	PNR	2016	1	0	2016-09-24	1	5	5	28	2	2016-08-25	1	99	9	9	2016-08-26	2000-01-01	8	2000-01-01	0	8	1	2016-10-21	5	5	2	9	10500	0	0	0	2016-05-21	1	0	1	5	3	2016-05-06	2	3	0	0
2016-12-07	MH	PNR	2016	1	1	2016-12-07	1	5	5	33	1	2016-10-13	1	99	9	9	2016-10-14	2016-10-12	1	2016-10-13	0	8	1	2017-02-03	5	5	7	7	1250	0	0	0	2016-09-01	1	0	1	4	1	2016-10-11	1	1	0	0
2016-12-07	MH	PNR	2016	1	1	2016-12-07	1	8	8	20	1	2016-11-01	1	99	9	9	2016-11-01	2016-11-01	1	2016-11-01	0	8	1	2017-02-03	3	1	4	0	10000	1	1	0	2016-10-01	0	0	2	5	1	2016-10-15	1	2	0	0
2016-12-07	MH	PNR	2016	1	1	2016-12-07	0	2	2	35	1	2016-11-01	1	99	9	9	2016-11-02	2016-11-01	1	2016-11-01	0	8	1	2017-02-03	5	5	4	4	3000	0	0	0	2016-10-12	1	1	1	4	1	2016-11-27	1	1	0	0
2016-12-07	MH	PNR	2016	1	0	2016-12-07	1	15	15	35	1	2016-11-08	1	99	9	9	2016-11-10	2000-01-01	8	2000-01-01	0	8	1	2017-02-03	4	4	5	5	1500	0	0	0	2016-10-20	0	0	0	4	1	2016-11-05	1	1	0	0
2016-12-07	MH	PNR	2016	1	0	2016-12-07	0	2	2	40	1	2016-11-12	1	99	9	9	2016-11-14	2000-01-01	8	2000-01-01	0	8	1	2017-02-03	3	3	6	6	1428	1	0	0	2016-03-05	1	1	1	5	4	2016-03-10	1	2	0	0
2016-12-07	MH	PNR	2016	1	1	2016-12-07	1	7	7	24	2	2016-11-15	1	99	9	9	2016-11-15	2016-11-03	1	2016-11-15	0	8	1	2017-02-03	2	3	5	5	714	0	0	0	2016-10-30	0	0	0	4	1	2016-11-13	1	1	0	0
2016-12-07	MH	PNR	2016	1	0	2016-12-07	1	15	15	40	2	2016-11-21	1	99	9	9	2016-11-23	2000-01-01	8	2000-01-01	0	8	1	2017-02-15	2	5	2	7	1250	0	0	0	2016-10-20	1	0	1	4	1	2016-11-18	1	1	0	0
2017-01-25	MH	PNR	2016	1	1	2017-01-25	0	5	5	26	1	2016-12-03	1	99	9	9	2016-12-06	2016-12-02	1	2016-12-02	0	8	1	2017-02-06	1	1	5	5	1000	0	0	0	2016-11-15	1	1	1	7	2	2017-01-01	2	3	0	0
2017-01-25	MH	PNR	2016	1	1	2017-01-25	0	15	15	28	1	2016-12-06	3	99	9	9	2016-12-07	2016-12-01	1	2016-12-05	0	8	1	2017-02-06	4	5	6	6	1800	0	0	0	2016-11-10	1	0	0	5	2	2016-11-21	1	2	0	0
2017-01-25	MH	PNR	2016	1	0	2017-01-25	1	10	10	55	2	2016-12-01	1	99	9	9	2016-12-07	2000-01-01	8	2000-01-01	0	8	1	2017-02-06	2	2	5	5	600	0	0	0	2016-10-31	1	0	1	8	2	2016-11-10	1	2	0	0
2017-03-01	MH	PNR	2017	1	1	2017-03-01	1	10	10	20	1	2017-01-02	1	99	9	9	2017-01-02	2017-01-01	1	2017-01-01	0	8	1	2017-05-01	5	5	3	6	6000	0	0	0	2017-01-15	1	0	1	5	2	2017-02-01	1	2	0	0
2017-03-01	MH	PNR	2017	1	1	2017-03-01	1	3	3	62	2	2017-01-04	1	99	9	9	2017-01-04	2017-01-04	1	2017-01-04	0	8	1	2017-05-01	3	3	6	6	5000	0	0	0	2017-01-20	1	0	1	5	2	2017-01-15	1	2	0	0
2017-03-01	MH	PNR	2017	1	0	2017-03-01	1	2	2	18	2	2017-01-08	1	99	9	9	2017-01-08	2000-01-01	8	2000-01-01	0	8	1	2017-05-01	4	4	6	6	1500	1	0	0	2016-12-01	1	0	1	7	1	2016-12-15	1	1	0	0
2017-03-01	MH	PNR	2017	1	0	2017-03-01	0	2	2	22	1	2017-01-18	1	99	9	9	2017-01-21	2000-01-01	8	2000-01-01	0	8	1	2017-05-01	5	5	6	6	1000	1	1	0	2017-01-05	1	0	1	4	2	2017-01-11	1	2	0	0
2016-06-17	MH	WDH	2016	1	0	2017-02-03	0	4	4	60	2	2016-05-24	1	45	0	0	2016-05-24	2000-01-01	8	2000-01-01	0	8	1	2017-02-17	3	2	6	6	2000	1	0	0	2014-06-08	1	0	1	4	4	2014-06-30	1	1	0	0
2017-02-05	MH	WDH	2017	1	0	2017-02-07	0	1	1	32	1	2017-01-02	0	99	0	9	2017-01-02	2000-01-01	8	2000-01-01	0	8	1	2017-02-20	5	5	6	8	9375	0	0	0	2016-12-15	1	0	0	4	2	2016-12-16	1	2	1	0
2017-02-05	MH	WDH	2017	1	0	2017-02-07	1	10	10	58	1	2017-01-21	3	99	0	9	2017-01-25	2000-01-01	8	2000-01-01	0	8	1	2017-02-17	2	2	5	5	1875	0	0	0	2016-10-21	1	0	1	4	3	2016-10-25	2	3	0	1
2016-04-26	MH	WDH	2016	1	0	2016-04-26	0	6	6	30	2	2016-03-01	3	44	0	0	2016-03-03	2000-01-01	8	2000-01-01	0	8	1	2016-06-24	4	4	2	4	6000	0	0	0	2016-01-15	0	0	1	5	1	2016-01-20	1	1	0	0
2016-05-18	MH	WDH	2016	1	0	2016-04-25	0	3	3	30	2	2016-04-26	2	50	0	0	2016-04-29	2000-01-01	8	2000-01-01	0	8	1	2016-06-24	2	3	2	4	2000	0	0	0	2016-03-12	0	0	1	4	3	2016-03-14	1	1	0	0
2016-05-18	MH	WDH	2016	1	1	2016-05-25	1	3	3	49	1	2016-04-30	3	53	0	9	2016-05-05	2016-04-22	2	2016-04-22	0	8	1	2016-04-24	4	4	4	4	1250	0	0	0	2016-01-12	0	0	0	7	3	2016-01-13	1	2	1	1
2016-06-17	MH	WDH	2016	1	0	2016-06-23	0	4	4	30	1	2016-05-13	2	99	0	9	2016-05-14	2000-01-01	8	2000-01-01	0	8	1	2017-02-17	3	5	6	6	2000	0	0	0	2016-01-28	1	0	1	7	6	2016-02-20	1	5	1	0
2016-09-12	MH	WDH	2016	1	0	2017-02-03	1	5	5	22	1	2016-08-10	2	99	0	0	2016-08-12	2000-01-01	8	2000-01-01	0	8	1	2017-02-17	5	4	5	5	2500	0	0	0	2016-06-25	1	1	1	4	2	2016-08-09	1	2	0	0
2016-09-12	MH	WDH	2016	1	1	2017-02-03	1	6	6	65	2	2016-08-10	1	99	0	0	2016-08-16	2016-03-01	1	2016-08-10	0	8	1	2017-02-20	0	0	2	2	1433	1	1	0	2016-06-10	1	0	1	7	1	2016-06-28	2	3	0	0
2017-02-05	MH	WDH	2017	1	0	2017-02-07	0	3	3	31	1	2017-01-07	0	99	0	9	2017-01-20	2000-01-01	8	2000-01-01	0	8	1	2017-02-17	3	2	3	6	1000	1	0	0	2016-10-14	1	0	1	4	3	2016-10-30	1	2	0	0
2016-07-27	MP	CTP	2016	1	0	2016-08-29	9	11	11	29	1	2016-06-06	3	46	0	9	2016-06-07	2000-01-01	8	2000-01-01	0	8	1	2016-09-23	2	2	4	4	1500	0	0	0	2016-03-26	1	0	1	8	1	2016-06-06	1	1	1	1
2016-07-27	MP	CTP	2016	1	1	2016-08-29	1	18	18	40	1	2016-06-11	1	45	0	9	2016-06-13	2016-05-06	2	2016-05-06	0	8	1	2016-09-23	0	0	5	5	999999	1	0	0	2016-05-06	1	0	1	8	1	2016-06-11	0	0	0	1
2016-11-23	MP	CTP	2016	1	1	2016-12-14	9	16	16	60	1	2016-11-03	1	40	0	9	2016-11-03	2016-11-03	2	2016-11-03	0	8	1	2017-04-25	0	0	5	5	375	0	0	0	2016-10-30	0	0	0	7	2	2016-10-28	2	3	1	1
2016-11-23	MP	CTP	2016	1	0	2016-12-14	9	6	6	40	1	2016-05-05	1	45	0	9	2016-11-05	2000-01-01	8	2000-01-01	0	8	1	2017-04-25	0	0	5	5	500	0	0	0	2016-03-15	1	1	1	5	4	2016-04-15	1	2	0	1
2016-11-23	MP	CTP	2016	1	1	2016-12-06	9	14	14	18	2	2016-11-17	3	30	0	9	2016-11-18	2016-11-15	2	2016-11-15	0	8	1	2017-04-24	0	3	2	5	750	0	0	9	2016-07-15	1	1	1	7	2	2016-07-30	1	1	0	0
2016-11-28	MP	CTP	2016	1	1	2016-12-14	9	16	16	55	1	2016-11-26	1	40	0	9	2016-11-28	2016-11-04	2	2016-11-04	0	8	1	2017-04-25	0	0	5	5	500	0	0	0	2016-04-15	1	1	0	7	2	2016-11-15	2	3	1	1
2017-02-13	MP	CTP	2017	1	1	2017-03-16	1	20	20	59	1	2017-01-24	1	45	0	9	2017-01-24	1800-01-01	9	1800-01-01	0	8	1	2017-04-24	0	0	3	3	500	0	0	0	2017-01-25	1	1	1	4	1	2017-01-24	1	1	0	1
2017-02-13	MP	CTP	2017	1	1	2017-03-10	1	15	15	50	2	2017-01-30	2	48	0	9	2017-01-30	2017-01-23	2	2017-01-23	0	8	1	2017-04-24	0	0	2	5	999999	0	0	0	1800-01-01	9	9	9	9	99	1800-01-01	9	9	0	0
2017-02-13	MP	CTP	2017	1	1	2017-03-16	1	6	6	40	1	2017-02-02	1	45	0	9	2017-02-03	1800-01-01	9	1800-01-01	0	8	1	2017-04-24	0	0	5	5	500	0	0	0	2017-01-30	0	0	1	8	1	2017-02-02	1	1	0	0
2017-02-13	MP	CTP	2017	1	1	2017-03-11	1	11	11	67	1	2017-02-04	1	42	0	9	2017-02-07	1800-01-01	9	1800-01-01	0	8	1	2017-04-24	0	0	5	5	800	0	0	0	2016-12-15	1	0	1	5	2	2017-01-07	1	2	1	1
2016-06-14	MP	GRL	2016	1	1	2016-06-15	1	15	15	60	2	2016-05-16	2	99	0	9	2016-05-28	2016-05-07	1	2016-05-16	0	8	1	2016-09-04	0	0	2	5	1111	0	0	0	2015-05-31	1	0	1	7	5	2015-08-31	1	2	0	1
2016-06-15	MP	GRL	2016	1	1	2016-06-15	1	18	18	40	1	2016-04-18	1	99	0	9	2016-05-14	2016-04-09	2	2016-04-09	0	8	1	2016-11-05	1	1	4	4	222	0	0	0	2015-11-02	1	0	1	7	1	2015-11-06	2	3	1	1
2016-06-14	MP	GRL	2016	1	0	2016-06-15	1	16	16	25	2	2016-05-26	1	99	9	9	2016-05-30	2000-01-01	8	2000-01-01	0	8	1	2016-11-07	1	0	2	5	966	1	0	0	2016-05-26	0	0	0	8	1	2016-05-26	1	1	0	0
2016-10-17	MP	GRL	2016	1	0	2016-10-18	0	3	3	50	1	2016-09-02	2	46	0	0	2016-09-02	2000-01-01	8	2000-01-01	0	8	1	2016-11-04	1	1	7	7	800	0	0	0	2015-12-02	0	0	0	5	4	2016-10-01	1	5	0	1
2016-10-17	MP	GRL	2016	1	0	2016-10-18	0	7	7	40	1	2016-09-02	3	39	0	1	2016-09-03	2000-01-01	8	2000-01-01	0	8	1	2016-11-04	0	0	4	4	2000	0	0	0	2016-07-02	1	0	1	1	2	2016-08-16	2	3	1	1
2016-10-18	MP	GRL	2016	1	0	2016-10-18	1	25	25	40	1	2016-09-14	2	49	0	0	2016-09-12	2000-01-01	8	2000-01-01	0	8	1	2016-11-05	1	1	4	4	1000	1	0	0	2015-06-29	0	0	0	4	2	2016-09-14	1	2	1	1
2016-10-17	MP	GRL	2016	1	1	2016-10-18	1	15	15	30	2	2016-09-09	1	99	0	0	2016-09-13	2016-09-02	1	2016-09-09	0	8	1	2016-11-04	0	2	2	4	900	0	0	0	2016-08-24	1	0	0	7	1	2016-08-16	2	3	0	0
2016-10-17	MP	GRL	2016	1	1	2016-10-18	1	20	20	45	1	2016-09-10	0	99	0	0	2016-09-14	2016-09-04	1	2016-09-10	0	8	1	2016-11-07	0	0	4	4	1333	0	0	0	2015-08-25	1	0	0	7	0	2016-09-10	0	0	1	1
2016-10-17	MP	GRL	2016	1	1	2016-10-18	1	18	18	60	1	2016-09-20	1	99	0	9	2016-09-26	2016-08-09	1	2016-09-20	0	8	1	2016-11-05	1	1	4	4	1000	0	0	0	2016-08-20	0	0	0	7	0	2016-09-20	0	0	0	1
2016-11-12	MP	GRL	2016	1	0	2016-12-02	1	5	5	50	2	2016-10-06	1	99	9	9	2016-10-06	2000-01-01	8	2000-01-01	0	8	1	2017-01-09	0	0	2	4	1000	1	0	0	2016-10-06	1	1	0	1	1	2016-10-06	1	1	0	0
2016-11-12	MP	GRL	2016	1	0	2016-12-02	1	2	2	60	1	2016-10-06	3	99	9	9	2016-10-07	2000-01-01	8	2000-01-01	0	8	1	2017-01-10	2	2	4	4	750	0	0	0	2016-01-01	1	0	0	8	2	2016-10-05	2	3	0	1
2016-11-07	MP	GRL	2016	1	1	2016-12-02	1	10	10	50	1	2016-10-17	0	99	9	9	2016-10-20	2016-10-12	1	2016-10-17	0	8	1	2017-01-10	0	0	4	4	833	0	0	0	2016-10-02	1	0	0	7	0	2016-10-17	0	0	0	1
2016-11-07	MP	GRL	2016	1	1	2016-12-02	1	20	20	55	1	2016-10-18	1	99	9	9	2016-10-18	2016-10-09	1	2016-10-13	0	8	1	2017-01-10	0	0	5	5	1600	0	0	0	2016-10-15	1	0	0	7	0	2016-10-18	0	0	0	1
2016-11-07	MP	GRL	2016	1	1	2016-12-02	1	20	20	30	2	2016-10-18	1	99	9	9	2016-10-18	2016-10-10	1	2016-10-13	0	8	1	2017-01-09	0	3	5	4	1000	0	0	0	2016-10-10	1	0	1	7	0	2016-10-18	0	0	0	0
2016-11-12	MP	GRL	2016	1	0	2016-12-02	0	2	2	65	1	2016-10-21	1	99	9	9	2016-10-22	2000-01-01	8	2000-01-01	0	8	1	2017-01-11	1	1	5	5	1500	0	0	0	2016-10-06	1	0	0	4	1	2016-10-21	1	1	0	0
2016-11-07	MP	GRL	2016	1	1	2016-12-02	1	10	10	72	1	2016-10-14	1	99	9	9	2016-10-17	2016-10-07	1	2016-10-14	0	8	1	2017-01-11	2	2	4	4	1250	0	0	0	2016-09-30	0	0	0	7	0	2016-10-14	0	0	0	0
2016-11-08	MP	GRL	2016	1	1	2016-12-02	1	10	10	34	1	2016-10-14	1	99	9	9	2016-10-19	2016-10-09	1	2016-10-14	0	8	1	2017-01-11	5	5	5	5	2500	0	0	0	2016-10-10	0	0	0	7	0	2016-10-14	0	0	0	1
2016-11-12	MP	GRL	2016	1	0	2016-12-02	1	15	15	75	2	2016-10-27	1	99	9	9	2016-10-28	2000-01-01	8	2000-01-01	0	8	1	2017-01-11	0	0	2	2	833	1	1	0	2016-08-11	0	0	0	8	1	2016-10-27	1	1	1	0
2016-12-09	MP	GRL	2016	1	0	2016-12-23	0	2	2	65	1	2016-11-08	1	42	2	9	2016-11-12	2000-01-01	8	2000-01-01	0	8	1	2017-01-10	0	0	5	5	2000	0	0	0	2016-06-01	0	0	0	8	1	2016-08-01	1	1	0	0
2016-12-09	MP	GRL	2016	1	0	2016-12-23	1	10	10	22	2	2016-11-16	1	35	2	9	2016-11-18	2000-01-01	8	2000-01-01	0	8	1	2017-01-09	0	1	2	5	2444	0	0	0	2016-11-16	0	0	0	1	1	2016-11-16	1	1	0	0
2016-12-09	MP	GRL	2016	1	1	2016-12-23	1	12	12	75	1	2016-11-21	1	42	2	9	2016-11-24	2016-11-20	1	2016-11-21	0	8	1	2017-01-10	0	0	3	3	625	0	0	0	2015-11-21	1	0	1	7	2	2015-12-21	2	3	0	0
2016-12-09	MP	GRL	2016	1	1	2016-12-23	1	7	7	55	2	2016-11-22	1	40	2	9	2016-11-26	2016-11-16	1	2016-11-22	0	8	1	2017-01-11	0	0	2	4	500	0	0	0	2015-12-07	1	0	0	7	3	2016-10-07	1	2	0	0
2017-01-12	MP	GRL	2016	1	0	2017-01-12	0	3	3	60	2	2016-11-30	2	42	0	1	2016-11-30	2000-01-01	8	2000-01-01	0	8	1	2017-01-12	0	2	2	5	16666	1	0	0	2016-09-13	1	0	1	6	6	2016-09-20	2	3	0	0
2017-01-12	MP	GRL	2016	1	1	2017-01-12	1	25	25	35	1	2016-12-12	1	40	9	9	2016-12-15	2016-12-07	1	2016-12-10	0	8	1	2017-01-12	1	1	5	5	1333	0	0	0	2016-12-12	0	0	0	7	0	2016-12-12	0	0	0	1
2017-01-12	MP	GRL	2016	1	0	2017-01-12	0	2	2	50	1	2016-12-15	1	52	0	0	2016-12-15	2000-01-01	8	2000-01-01	0	8	1	2017-01-12	1	1	4	4	5000	1	1	0	2016-10-20	0	0	0	8	3	2016-11-14	1	2	0	0
2017-03-08	MP	GRL	2017	1	0	2017-04-17	0	5	5	50	1	2017-01-04	2	99	0	9	2017-01-06	2000-01-01	8	2000-01-01	0	8	1	2017-04-18	1	1	4	4	1800	0	0	0	2016-11-18	1	0	1	1	2	2016-12-03	2	3	1	1
2017-03-08	MP	GRL	2017	1	0	2017-04-17	1	3	3	40	1	2017-01-09	1	99	0	9	2017-01-10	2000-01-01	8	2000-01-01	0	8	1	2017-04-18	0	0	4	4	642	0	0	0	2016-11-25	1	0	1	8	2	2016-12-25	2	3	1	1
2017-03-08	MP	GRL	2017	1	1	2017-04-17	1	20	20	60	1	2017-01-14	0	99	0	9	2017-01-18	2017-01-08	1	2017-01-14	0	8	1	2017-04-17	0	0	5	5	900	0	0	0	2017-01-15	0	0	0	7	0	2017-01-14	0	0	1	0
2017-03-08	MP	GRL	2017	1	1	2017-04-17	1	20	20	60	1	2017-01-14	1	99	0	9	2017-01-18	2017-01-09	1	2017-01-14	0	8	1	2017-04-17	1	1	4	4	540	0	0	0	2016-12-14	1	0	0	7	0	2017-01-14	0	0	0	1
2017-03-08	MP	GRL	2017	1	1	2017-04-17	1	20	20	70	1	2017-01-14	1	99	0	9	2017-01-18	2017-01-06	1	2017-01-14	0	8	1	2017-04-17	0	0	5	5	2000	0	0	0	2016-11-30	0	0	0	7	0	2017-01-14	0	0	0	0
2017-03-08	MP	GRL	2017	1	0	2017-04-17	1	5	5	50	2	2017-01-11	1	99	0	9	2017-01-16	2000-01-01	8	2000-01-01	0	8	1	2017-04-18	3	3	8	3	2000	1	0	0	2016-07-28	1	0	1	6	2	2016-08-28	2	3	0	0
2017-03-08	MP	GRL	2017	1	0	2017-04-17	0	4	4	32	1	2017-01-17	1	99	0	9	2017-01-18	2000-01-01	8	2000-01-01	0	8	1	2017-04-18	1	1	4	4	900	0	0	0	2017-01-17	0	0	0	8	1	2017-01-17	1	1	1	1
2017-03-08	MP	GRL	2017	1	1	2017-04-17	1	25	25	55	1	2017-01-18	1	99	0	9	2017-01-27	2017-01-09	1	2017-01-18	0	8	1	2017-04-18	0	0	4	4	1500	0	0	0	2017-01-18	0	0	0	7	0	2017-01-18	0	0	1	1
2017-03-08	MP	GRL	2017	1	1	2017-04-17	1	25	25	50	1	2017-01-17	1	99	0	9	2017-01-27	2017-01-08	1	2017-01-17	0	8	1	2017-04-18	0	0	5	5	1000	0	0	0	2016-02-01	1	1	1	7	3	2016-02-10	1	2	1	1
2017-03-08	MP	GRL	2017	1	1	2017-04-17	1	25	25	60	2	2017-01-18	1	99	0	9	2017-01-27	2017-01-08	1	2017-01-17	0	8	1	2017-04-18	0	0	3	3	200	0	0	0	2017-01-18	0	0	0	7	0	2017-01-18	0	0	0	0
2017-03-08	MP	GRL	2017	1	1	2017-04-17	1	20	20	24	2	2017-02-09	0	99	0	9	2017-02-27	2017-02-01	1	2017-02-09	0	8	1	2017-04-17	0	1	4	4	1800	0	0	0	2016-04-01	1	0	0	7	0	2017-02-09	0	0	0	0
2017-03-08	MP	GRL	2017	1	0	2017-04-17	1	45	45	40	1	2017-02-13	3	99	0	9	2017-02-16	2000-01-01	8	2000-01-01	0	8	1	2017-04-18	2	2	5	5	714	0	0	0	2016-12-13	1	0	0	1	3	2016-12-13	1	2	0	0
2016-05-11	MP	GRL	2016	1	0	2016-05-11	0	1	1	46	2	2016-03-19	0	40	2	9	2016-03-25	2000-01-01	8	2000-01-01	0	8	1	2016-06-04	3	5	2	4	500	1	1	0	2016-03-03	1	0	1	4	1	2016-03-19	1	1	0	1
2016-05-11	MP	GRL	2016	1	1	2016-05-11	1	20	20	45	1	2016-03-26	2	45	0	9	2016-03-29	2016-01-17	2	2016-01-17	0	8	1	2016-06-05	0	0	5	5	1000	0	0	0	2016-01-17	0	0	1	7	1	2016-03-26	1	1	0	1
2016-07-19	MP	GRL	2016	1	1	2016-07-16	1	28	28	35	2	2016-05-16	1	99	2	9	2016-05-28	2016-05-07	1	2016-05-16	0	8	1	2016-07-19	0	5	4	4	333	0	0	0	2016-05-01	0	0	0	7	2	2016-06-06	2	3	0	1
2016-07-12	MP	GRL	2016	1	0	2016-07-16	0	2	2	62	1	2016-06-20	2	40	0	0	2016-06-22	2000-01-01	8	2000-01-01	0	8	1	2016-11-04	1	4	1	4	1500	0	0	0	2016-05-30	1	0	0	4	2	2016-05-30	2	3	1	1
2016-10-13	MP	GRL	2016	1	1	2016-10-19	1	10	10	55	2	2016-09-17	0	35	0	0	2016-09-19	2016-09-09	2	2016-09-09	0	8	1	2016-11-03	0	0	2	5	999999	0	0	0	2016-06-01	1	0	0	7	4	2016-06-15	2	3	0	1
2016-10-13	MP	GRL	2016	1	0	2016-10-19	0	10	10	62	1	2016-09-22	0	35	0	0	2016-09-24	2000-01-01	8	2000-01-01	0	8	1	2016-11-03	1	1	3	3	0	0	0	0	2016-05-06	1	0	1	4	3	2016-05-20	2	3	0	1
2016-10-13	MP	GRL	2016	1	0	2016-10-19	0	2	2	19	1	2016-09-22	2	38	0	0	2016-09-27	2000-01-01	8	2000-01-01	0	8	1	2016-11-03	3	3	4	5	1000	0	0	0	2016-09-06	1	0	1	4	2	2016-09-07	2	3	1	1
2016-04-16	MP	GRL	2016	1	1	2016-04-19	1	20	20	40	1	2016-10-17	3	99	0	0	2016-10-19	2016-09-07	1	2016-09-12	0	8	1	2017-04-16	1	1	4	4	3600	1	0	0	2016-09-02	0	1	1	7	1	2016-09-07	1	2	1	1
2017-01-13	MP	GRL	2016	1	1	2017-01-13	1	10	10	35	1	2016-12-14	1	38	0	0	2016-12-16	2016-10-05	1	2016-12-14	0	8	1	2017-01-13	0	0	2	2	428	0	0	0	2016-11-25	1	0	1	7	0	2016-12-14	0	0	1	0
2017-01-13	MP	GRL	2016	1	0	2017-01-13	0	6	6	27	2	2016-12-28	1	99	0	0	2016-12-30	2000-01-01	8	2000-01-01	0	8	1	2017-04-18	0	2	8	2	2333	1	1	0	2016-10-12	1	0	0	1	2	2016-11-12	2	3	0	0
2017-01-13	MP	GRL	2016	1	1	2017-01-13	1	25	25	54	1	2016-12-22	1	99	0	9	2016-12-26	2016-12-04	1	2016-12-22	0	8	1	2017-01-13	1	1	5	5	166	0	0	0	2016-11-15	0	0	0	7	1	2016-11-20	1	1	0	1
2017-03-03	MP	GRL	2017	1	0	2017-04-19	0	5	5	63	1	2017-01-12	1	51	0	0	2017-01-13	2000-01-01	8	2000-01-01	0	8	1	2017-04-18	1	1	4	4	2666	0	0	0	2016-05-27	1	0	1	8	3	2016-09-27	1	1	1	0
2017-03-03	MP	GRL	2017	1	0	2017-03-04	1	35	35	25	2	2017-01-24	3	32	0	0	2017-01-30	2000-01-01	8	2000-01-01	0	8	1	2017-04-16	0	0	4	4	1800	0	0	0	2016-08-15	1	0	1	1	1	2017-01-24	1	1	0	0
2017-03-03	MP	GRL	2017	1	0	2017-04-19	0	10	10	27	1	2017-01-28	3	46	0	0	2017-02-01	2000-01-01	8	2000-01-01	0	8	1	2017-04-18	9	3	4	3	1000	1	0	0	2017-01-15	1	0	1	3	2	2017-01-22	2	3	1	0
2017-03-03	MP	GRL	2017	1	1	2017-03-04	1	25	25	32	2	2017-02-07	1	38	0	0	2017-02-10	2017-01-07	1	2017-02-07	0	8	1	2017-04-16	0	0	4	4	2700	0	0	0	2017-02-07	1	0	0	7	0	2017-02-07	0	0	0	0
2017-03-03	MP	GRL	2017	1	1	2017-03-04	1	25	25	22	2	2017-02-08	1	42	0	0	2017-02-10	2017-01-08	1	2017-01-08	0	8	1	2017-04-16	1	0	4	4	1800	1	0	0	2017-01-22	1	1	0	7	1	2017-01-23	1	5	0	0
2017-03-03	MP	GRL	2017	1	0	2017-03-04	0	3	3	35	2	2017-02-08	1	40	0	0	2017-02-13	2000-01-01	8	2000-01-01	0	8	1	2017-04-16	2	4	6	4	1000	1	0	0	2016-08-08	1	0	0	8	2	2016-09-08	2	3	0	0
2016-07-22	MP	IDR	2016	1	0	2016-07-21	0	999	10	50	2	2016-06-20	1	99	0	9	2016-06-21	2000-01-01	8	2000-01-01	0	8	1	2016-09-30	0	3	2	4	4200	1	0	0	2016-04-30	1	0	1	4	1	2016-06-01	1	1	0	0
2017-01-30	MP	IDR	2016	1	1	2017-01-30	0	2	2	20	1	2016-12-26	0	99	0	0	2016-12-26	2016-12-09	1	2016-12-26	0	8	1	2017-03-09	3	3	8	8	3600	1	0	0	2016-06-26	0	0	0	7	3	2016-06-30	2	3	0	0
2017-01-30	MP	IDR	2016	1	1	2017-01-30	0	2	2	16	1	2016-12-24	1	99	0	0	2016-12-26	2016-12-12	1	2016-12-24	0	8	1	2017-03-09	2	9	7	7	5000	0	0	0	2016-12-22	1	0	0	6	1	2016-12-24	1	1	0	0
2017-01-30	MP	IDR	2016	1	0	2016-06-02	0	4	4	66	1	2016-12-27	1	99	0	0	2016-12-27	2000-01-01	8	2000-01-01	0	8	1	2017-03-09	5	5	3	3	10000	0	0	0	2016-10-15	1	0	1	5	1	2016-12-27	1	1	0	0
2017-01-30	MP	IDR	2016	1	1	2017-01-30	0	2	2	32	1	2016-12-20	2	41	0	0	2016-12-30	2016-12-19	1	2016-12-19	0	8	1	2017-03-09	5	5	4	4	2400	0	0	0	2016-12-01	1	0	1	5	2	2016-11-15	1	2	1	1
2017-01-27	MP	IDR	2016	1	1	2017-01-27	0	1	1	19	1	2016-12-03	0	39	0	0	2016-12-05	2016-12-01	1	2016-12-03	0	8	1	2017-03-09	4	4	6	6	3400	1	0	0	2016-11-30	1	0	1	6	2	2016-11-25	1	2	0	0
2017-01-30	MP	IDR	2016	1	0	2017-02-06	0	3	3	20	2	2016-12-01	1	99	0	0	2016-12-03	2000-01-01	8	2000-01-01	0	8	1	2017-03-09	4	3	1	6	3750	0	0	9	2016-10-15	1	0	1	3	5	2016-10-15	1	2	0	0
2016-05-17	MP	KDW	2016	1	0	2016-05-10	1	999	12	45	1	2016-04-05	3	41	0	0	2016-04-07	2000-01-01	8	2000-01-01	0	8	1	2016-11-15	0	0	5	5	4000	0	0	0	2016-03-10	1	0	1	7	3	2016-03-25	1	2	0	0
2016-05-17	MP	KDW	2016	1	0	2016-05-10	1	999	11	35	1	2016-04-24	1	40	0	0	2016-04-26	2000-01-01	8	2000-01-01	0	8	1	2016-06-24	1	1	3	3	714	0	0	0	2016-04-10	1	0	1	8	1	2016-04-28	1	1	0	0
2016-05-17	MP	KDW	2016	1	1	2016-05-10	1	999	1	48	1	2016-04-27	2	39	0	0	2016-04-30	2016-04-14	2	2016-04-27	0	8	1	2016-06-23	0	0	0	0	200	0	0	0	2016-01-15	1	0	1	7	1	2016-02-15	2	3	0	0
2016-06-15	MP	KDW	2016	1	0	2016-06-16	1	999	12	17	1	2016-05-02	1	47	0	0	2016-05-02	2000-01-01	8	2000-01-01	0	8	1	2016-11-15	3	3	1	7	1750	0	0	0	2016-02-15	1	0	1	8	4	2016-03-10	1	2	0	0
2016-06-15	MP	KDW	2016	1	1	2016-06-16	1	999	1	45	1	2016-05-07	2	99	0	1	2016-05-11	2016-05-04	1	2016-05-07	0	8	1	2016-11-15	4	4	6	6	2600	0	0	0	2016-05-07	1	0	0	7	1	2016-05-07	0	0	0	0
2016-06-15	MP	KDW	2016	1	1	2016-06-16	1	999	1	17	1	2016-05-10	1	99	0	0	2016-05-11	2016-04-20	1	2016-05-10	0	8	1	2016-06-23	2	1	2	4	999999	1	0	0	2016-01-15	1	0	1	7	2	2016-01-15	2	3	0	0
2016-06-15	MP	KDW	2016	1	1	2016-06-16	1	999	1	41	1	2016-05-17	2	99	0	0	2016-05-20	2016-05-14	1	2016-05-17	0	8	1	2016-11-15	0	0	4	4	500	1	0	0	2014-06-01	1	0	1	7	99	1800-01-01	1	3	0	0
2016-06-15	MP	KDW	2016	1	1	2016-06-16	1	999	1	40	1	2016-05-27	1	99	0	0	2016-05-27	2016-05-22	1	2016-05-27	0	8	1	2016-11-15	2	2	4	4	1000	0	0	0	2015-11-30	1	0	0	7	3	2015-12-15	1	2	1	0
2016-06-15	MP	KDW	2016	1	0	2016-06-16	1	999	11	17	1	2016-05-29	1	40	0	0	2016-05-30	2000-01-01	8	2000-01-01	0	8	1	2016-06-24	0	0	5	5	999999	1	1	0	2016-05-14	1	0	1	3	1	2016-05-28	1	1	0	0
2016-07-20	MP	KDW	2016	1	1	2016-07-28	1	4	30	20	1	2016-06-01	1	45	0	0	2016-06-01	2016-05-12	2	2016-05-12	0	8	1	2016-11-16	3	3	5	5	500	1	0	0	2016-03-20	0	0	1	7	3	2016-03-30	1	2	0	0
2016-07-20	MP	KDW	2016	1	0	2016-07-28	1	999	32	40	2	2016-06-01	1	30	0	0	2016-06-01	2000-01-01	8	2000-01-01	0	8	1	2016-11-15	0	0	2	5	711	0	0	0	2016-01-30	1	1	1	1	2	2016-03-15	1	2	0	0
2016-07-20	MP	KDW	2016	1	0	2016-07-28	1	999	70	55	1	2016-06-15	2	41	0	0	2016-06-15	2000-01-01	8	2000-01-01	0	8	1	2016-11-16	0	0	4	4	1333	0	0	0	2015-06-15	1	0	1	2	3	2015-06-15	1	2	1	1
2016-07-20	MP	KDW	2016	1	1	2016-07-28	1	999	3	44	1	2016-06-16	1	40	0	0	2016-06-22	2016-05-22	1	2016-06-16	0	8	1	2016-11-15	0	0	3	3	1500	0	0	0	2016-05-01	1	0	0	7	2	2016-05-15	1	2	1	1
2016-05-25	MP	RWA	2016	1	0	2016-05-20	1	4	4	25	1	2016-04-02	1	40	2	9	2016-04-02	2000-01-01	8	2000-01-01	0	8	1	2016-05-31	2	0	4	4	857	0	0	0	2016-02-17	1	0	0	6	1	2016-04-02	1	1	0	0
2016-04-19	MP	RWA	2016	1	1	2016-05-20	1	11	9	40	2	2016-04-23	1	42	2	9	2016-04-25	2016-04-15	1	2016-04-21	0	8	1	2016-05-30	0	2	2	4	2200	0	0	0	2016-03-31	1	1	0	7	1	2016-04-16	1	1	0	0
2016-07-21	MP	RWA	2016	1	0	2016-07-21	1	12	12	26	1	2016-05-09	1	46	2	9	2016-05-10	2000-01-01	8	2000-01-01	0	8	1	2016-09-11	3	4	3	6	1800	0	0	9	2016-01-21	1	0	1	6	17	2016-02-09	1	1	0	1
2016-07-21	MP	RWA	2016	1	1	2016-07-21	1	9	9	27	1	2016-06-11	3	42	0	0	2016-06-11	2016-04-20	1	2016-04-20	0	8	1	2016-08-03	3	0	4	4	469	0	0	0	2016-03-25	0	0	0	7	0	2016-06-11	0	0	0	0
2016-07-21	MP	RWA	2016	1	1	2016-07-21	1	9	9	70	2	2016-06-07	9	36	0	9	2016-06-09	2016-06-07	1	2016-06-07	0	8	1	2016-09-10	0	3	2	4	600	0	0	9	2016-03-02	1	0	0	6	0	2016-06-07	0	0	0	0
2016-07-21	MP	RWA	2016	1	0	2016-07-21	1	11	11	55	1	2016-06-11	1	38	0	9	2016-06-16	2000-01-01	8	2000-01-01	0	8	1	2016-08-03	0	0	4	4	950	0	1	0	2016-06-04	0	0	0	6	1	2016-06-11	1	1	0	0
2016-08-25	MP	RWA	2016	1	1	2016-08-21	1	5	5	20	2	2016-06-18	1	38	0	0	2016-06-20	2016-06-13	1	2016-06-18	0	8	1	2016-09-26	4	5	2	4	750	1	0	0	2016-06-18	1	1	1	5	2	2016-06-18	1	2	0	0
2016-08-25	MP	RWA	2016	1	1	2016-08-21	1	11	11	60	2	2016-06-14	1	39	0	0	2016-06-27	2016-06-13	1	2016-06-14	0	8	1	2016-09-25	1	1	4	4	800	0	0	0	2016-05-20	1	0	1	7	0	2016-06-14	0	0	0	0
2016-08-25	MP	RWA	2016	1	0	2016-08-22	1	16	16	50	1	2016-07-18	1	47	0	0	2016-07-27	2000-01-01	8	2000-01-01	0	8	1	2016-09-25	1	1	4	4	500	0	0	0	2016-04-15	1	0	1	5	8	2016-06-25	2	3	1	1
2016-09-27	MP	RWA	2016	1	1	2016-09-14	1	3	3	70	1	2016-08-03	3	44	0	0	2016-08-11	2016-07-24	1	2016-08-03	0	8	1	2016-11-17	0	0	4	4	600	1	0	0	2016-07-29	1	0	1	7	0	2016-08-03	0	0	1	1
2016-11-29	MP	RWA	2016	1	0	2016-10-12	1	5	5	50	1	1800-01-01	1	47	0	0	2016-09-19	2000-01-01	8	2000-01-01	0	8	1	2017-02-08	0	0	4	4	350	0	0	0	2016-07-15	1	1	1	4	3	2016-07-17	1	2	0	1
2016-12-19	MP	RWA	2016	1	0	2016-12-19	1	9	9	26	1	2016-09-03	1	35	0	0	2016-09-15	2000-01-01	8	2000-01-01	0	8	1	2017-02-08	3	2	4	5	400	1	0	0	2016-07-15	1	0	1	4	3	2016-07-18	1	2	1	0
2016-11-29	MP	RWA	2016	1	1	2016-10-12	1	8	8	80	1	2016-10-13	2	99	0	0	2016-10-25	2016-10-02	1	2016-10-02	0	8	1	2017-02-08	0	0	3	3	500	0	0	0	2016-02-15	1	0	1	7	1	2016-10-25	1	1	1	1
2016-06-17	MP	RWA	2016	1	0	2016-06-14	1	8	8	18	1	2016-04-06	1	99	2	9	2016-04-09	2000-01-01	8	2000-01-01	0	8	1	2016-08-05	3	2	2	5	500	0	0	0	2016-04-15	1	0	1	7	1	2016-04-06	1	1	0	0
2016-06-17	MP	RWA	2016	1	1	2016-06-14	1	4	4	64	1	2016-05-02	1	41	2	9	2016-05-06	2016-04-27	1	2016-05-02	0	8	1	2016-08-02	0	0	4	4	583	1	1	0	2016-02-17	0	0	1	7	0	2016-05-02	0	0	1	1
2016-06-17	MP	RWA	2016	1	0	2016-06-14	1	9	9	60	1	2016-04-14	1	42	0	0	2016-04-21	2000-01-01	8	2000-01-01	0	8	1	2016-08-02	2	0	5	5	3125	0	0	0	2016-01-21	2	0	1	7	2	2016-04-06	1	1	1	0
2016-07-21	MP	RWA	2016	1	0	2016-07-21	1	9	9	80	1	2016-05-23	1	48	2	9	2016-06-02	2000-01-01	8	2000-01-01	0	8	1	2016-09-09	5	0	7	4	425	1	1	0	2016-04-07	1	1	0	6	1	2016-05-23	1	1	0	0
2016-07-21	MP	RWA	2016	1	1	2016-07-21	1	12	12	60	1	2016-05-18	2	42	2	9	2016-06-09	2016-05-16	1	2016-05-16	0	8	1	2016-09-09	0	0	4	4	1272	0	0	0	2016-01-08	9	1	1	7	2	2016-05-18	1	1	0	1
2016-07-21	MP	RWA	2016	1	1	2016-07-21	1	12	12	32	1	2016-05-18	3	40	2	9	2016-06-09	2016-05-16	1	2016-05-16	0	8	1	2016-09-09	2	0	4	4	833	0	0	0	2016-04-08	1	0	0	7	0	2016-05-18	0	0	1	1
2016-07-21	MP	RWA	2016	1	0	2016-07-21	1	20	20	17	2	2016-06-10	1	36	2	9	2016-06-14	2000-01-01	8	2000-01-01	0	8	1	2016-09-08	3	3	4	4	375	1	1	0	2016-06-14	1	0	1	6	1	2016-06-10	1	1	0	0
2016-07-21	MP	RWA	2016	1	0	2016-07-21	1	6	6	55	2	2016-06-15	1	47	0	0	2016-06-13	2000-01-01	8	2000-01-01	0	8	1	2016-09-09	0	0	2	4	1425	1	1	0	2016-06-09	1	1	0	6	4	2016-06-15	1	2	0	0
2016-07-21	MP	RWA	2016	1	1	2016-07-21	1	8	8	80	2	2016-06-13	2	38	2	9	2016-06-17	2016-06-11	1	2016-06-11	0	8	1	2016-09-09	0	3	2	4	300	1	1	0	2016-01-31	1	0	0	7	0	2016-06-13	0	0	0	0
2016-09-27	MP	RWA	2016	1	1	2016-07-21	1	8	8	58	1	2016-06-13	2	36	2	9	2016-06-17	2016-06-11	1	2016-06-11	0	8	1	2016-09-09	0	0	4	4	590	0	0	0	2015-04-29	1	0	1	7	0	2016-06-13	0	0	1	1
2016-07-21	MP	RWA	2016	1	1	2016-07-21	1	8	8	70	1	2016-06-13	1	40	2	9	2016-06-17	2016-06-11	1	2016-06-11	0	8	1	2016-09-09	0	0	3	4	350	1	0	9	2015-11-01	1	1	0	7	0	2016-06-13	0	0	0	0
2016-08-25	MP	RWA	2016	1	1	2016-08-20	1	6	6	40	2	2016-06-13	1	32	0	0	2016-06-20	2016-06-11	1	2016-06-13	0	8	1	2016-09-25	1	1	2	4	400	1	1	0	2016-05-15	1	0	1	7	0	2016-06-13	0	0	0	0
2016-09-27	MP	RWA	2016	1	0	2016-09-12	1	12	12	31	1	2016-07-12	1	43	0	0	2016-07-22	2000-01-01	8	2000-01-01	0	8	1	2016-11-16	2	2	5	4	250	1	0	0	2016-07-25	1	0	0	8	1	2016-07-12	1	1	1	1
2016-09-27	MP	RWA	2016	1	1	2016-09-12	1	12	12	40	1	2016-07-15	3	42	0	0	2016-07-30	2016-07-10	1	2016-07-15	0	8	1	2016-11-17	0	0	4	4	150	0	0	9	2016-07-10	1	0	1	7	0	2016-07-15	0	0	1	1
2016-09-27	MP	RWA	2016	1	1	2016-09-12	1	12	12	62	1	2016-07-22	3	41	0	0	2016-07-30	2016-07-16	1	2016-07-22	0	8	1	2016-11-17	0	0	4	4	300	0	0	0	1800-01-01	1	0	1	7	0	2016-07-22	0	0	1	1
2016-09-27	MP	RWA	2016	1	0	2016-09-12	1	15	15	27	1	2016-08-22	1	35	0	0	2016-08-24	2000-01-01	8	2000-01-01	0	8	1	2016-11-18	2	0	4	4	1800	1	1	0	2016-06-30	1	1	1	2	1	2016-08-22	1	1	1	1
2016-10-26	MP	RWA	2016	1	0	2016-10-21	1	22	22	99	1	2016-09-01	3	32	0	0	2016-09-02	2000-01-01	8	2000-01-01	0	8	1	2016-11-16	0	0	4	4	416	0	0	0	2016-04-15	1	0	1	5	1	2016-09-01	1	1	0	0
2016-10-26	MP	RWA	2016	1	0	2016-10-21	1	19	19	26	1	2016-09-08	1	51	0	0	2016-09-09	2000-01-01	8	2000-01-01	0	8	1	2016-11-16	4	0	4	4	999999	0	0	0	2016-08-28	1	0	0	5	2	2016-08-28	1	2	1	1
2016-10-26	MP	RWA	2016	1	1	2016-10-21	1	9	9	51	1	2016-08-24	3	50	0	0	2016-09-09	2016-08-16	1	2016-08-24	0	8	1	2016-11-19	0	0	4	4	500	1	1	0	2016-08-16	1	0	1	7	0	2016-08-24	0	0	1	1
2016-10-26	MP	RWA	2016	1	1	2016-10-21	1	9	9	26	2	2016-08-24	3	42	0	0	2016-09-09	2016-08-16	1	2016-08-24	0	8	1	2016-11-17	0	0	2	4	500	1	1	0	2016-08-16	1	0	1	7	0	2016-08-24	0	0	0	0
2016-12-19	MP	RWA	2016	1	0	2016-12-19	1	14	14	45	1	2016-09-14	1	40	0	0	2016-09-16	2000-01-01	8	2000-01-01	0	8	1	2017-02-27	0	0	4	4	350	0	0	0	2016-02-01	1	0	1	5	5	2016-02-08	2	3	0	0
2016-11-29	MP	RWA	2016	1	0	2016-10-14	1	3	3	50	1	2016-10-06	2	50	0	0	2016-10-13	2000-01-01	8	2000-01-01	0	8	1	2017-02-07	0	0	3	3	400	1	0	0	2016-08-15	1	0	1	4	1	2016-09-15	1	1	0	0
2016-12-19	MP	RWA	2016	1	0	2016-12-19	1	16	16	35	1	2016-10-28	1	35	0	0	2016-11-01	2000-01-01	8	2000-01-01	0	8	1	2017-02-07	3	3	7	7	1100	0	0	0	2016-08-15	1	0	1	4	4	2016-08-21	2	3	1	1
2016-11-29	MP	RWA	2016	1	1	2016-10-14	1	12	12	45	1	2016-10-28	1	99	0	0	2016-11-01	2016-10-20	1	2016-11-21	0	8	1	2017-02-07	0	0	3	3	250	1	0	0	2015-05-15	1	0	1	7	0	2016-10-28	0	0	1	0
2016-12-19	MP	RWA	2016	1	1	2016-12-12	1	3	3	62	1	2016-11-04	2	44	0	0	2016-11-15	2016-10-27	1	2016-10-27	0	8	1	2017-02-06	2	3	3	5	500	0	0	0	2016-01-15	1	1	0	7	99	2016-01-15	2	3	0	0
2016-12-19	MP	RWA	2016	1	1	2016-12-12	1	3	3	65	1	2016-11-20	2	38	0	0	2016-11-23	2016-11-08	1	2016-11-08	0	8	1	2017-02-06	0	0	3	3	300	0	0	0	2016-09-15	1	0	1	7	5	2016-09-26	1	2	0	0
2016-12-19	MP	RWA	2016	1	0	2016-12-12	1	4	4	60	1	2016-11-20	2	41	0	0	2016-11-24	2000-01-01	8	2000-01-01	0	8	1	2017-02-06	0	0	0	0	500	0	0	0	2016-11-14	0	0	0	4	1	2016-11-19	1	1	0	0
2016-12-19	MP	RWA	2016	1	1	2016-12-12	1	4	4	35	2	2016-11-22	1	40	0	0	2016-11-23	2016-11-11	1	2016-11-11	0	8	1	2017-02-07	0	0	4	4	400	1	0	0	2016-10-15	0	1	1	7	0	2016-11-22	0	0	0	0
2016-12-19	MP	RWA	2016	1	0	2016-12-12	1	16	16	20	1	2016-11-21	2	49	0	0	2016-11-24	2000-01-01	8	2000-01-01	0	8	1	2017-02-07	3	0	4	3	1250	0	0	0	2016-08-05	1	0	1	5	4	2016-09-18	1	2	1	0
2016-12-19	MP	RWA	2016	1	0	2016-12-12	1	9	9	40	2	2016-11-26	1	42	0	0	2016-11-30	2000-01-01	8	2000-01-01	0	8	1	2017-02-09	0	0	5	5	500	1	0	0	2016-08-15	1	0	1	4	3	2016-08-18	1	2	0	0
2017-02-02	MP	RWA	2016	1	1	2017-02-08	1	6	6	65	1	2016-12-01	1	42	0	0	2016-12-10	2016-11-26	1	2016-12-01	0	8	1	2017-04-05	0	0	4	4	500	0	0	9	1800-01-01	1	0	1	7	0	2016-12-01	0	0	0	1
2017-02-02	MP	RWA	2016	1	1	2017-02-08	1	6	6	45	2	2016-12-01	2	38	0	0	2016-12-10	2016-11-27	1	2016-12-01	0	8	1	2017-04-05	0	0	4	4	1000	0	0	9	2016-11-15	1	0	0	7	1	2016-12-01	1	1	0	0
2017-02-02	MP	RWA	2016	1	0	2017-01-08	1	3	3	18	2	2016-12-16	2	45	0	0	2016-12-20	2000-01-01	8	2000-01-01	0	8	1	2017-04-07	5	0	4	4	325	0	0	9	2016-12-20	1	1	1	2	1	2016-12-16	1	1	0	0
2017-02-02	MP	RWA	2016	1	0	2017-01-08	1	9	9	75	1	2016-12-22	1	45	0	0	2016-12-23	2000-01-01	8	2000-01-01	0	8	1	2017-04-07	0	0	4	4	500	0	0	9	2016-12-10	0	0	1	6	1	2016-12-22	1	1	0	1
2017-02-02	MP	RWA	2016	1	0	2017-01-08	1	21	21	50	1	2016-12-19	3	39	0	0	2016-12-20	2000-01-01	8	2000-01-01	0	8	1	2017-04-08	3	0	4	4	2000	0	0	9	2016-12-02	0	1	1	6	1	2016-12-19	1	1	1	1
2017-02-02	MP	RWA	2016	1	1	2017-01-08	1	19	19	56	2	2016-12-26	3	40	0	0	2016-12-27	2016-12-24	1	2016-12-26	0	8	1	2017-04-06	0	0	4	4	640	0	0	9	2016-12-14	1	0	1	7	0	2016-12-26	0	0	0	0
2017-02-02	MP	RWA	2016	1	1	2017-02-08	1	19	19	70	2	2016-12-26	3	36	0	0	2016-12-28	2016-12-24	1	2016-12-26	0	8	1	2017-04-06	0	1	4	4	200	1	1	9	2016-12-15	1	0	1	7	0	2016-12-26	0	0	0	0
2017-02-02	MP	RWA	2016	1	0	2017-01-08	1	14	14	28	2	2016-12-27	1	99	0	0	2016-12-31	2000-01-01	8	2000-01-01	0	8	1	2017-04-07	4	4	4	4	430	0	0	9	2016-12-12	1	0	1	6	2	2016-12-12	1	1	0	0
2017-02-02	MP	RWA	2016	1	0	2017-01-08	1	12	12	88	1	2016-12-27	1	31	0	0	2016-12-27	2000-01-01	8	2000-01-01	0	8	1	2017-04-05	4	0	6	5	8000	0	0	0	2016-11-24	1	0	1	5	1	2016-12-27	1	1	0	0
2017-02-02	MP	RWA	2016	1	1	2017-01-08	1	8	8	50	1	2016-12-27	2	38	0	0	2016-12-30	2016-12-23	1	2016-12-27	0	8	1	2017-04-06	0	0	4	4	1500	0	0	9	2016-12-15	1	1	1	7	0	2016-12-27	0	0	1	1
2017-02-02	MP	RWA	2016	1	1	2017-02-08	1	6	6	60	2	2016-12-27	1	39	0	0	2016-12-30	2016-12-16	1	2016-12-27	0	8	1	2017-04-06	0	0	4	4	630	0	0	9	2016-12-16	1	0	1	7	0	2016-12-27	0	0	0	0
2016-05-19	MP	RWA	2016	1	1	2016-05-16	1	15	10	28	2	2016-03-12	1	38	2	1	2016-03-12	2016-03-08	1	2016-03-12	0	8	1	2016-05-30	0	0	2	4	1000	1	1	0	2016-02-19	1	0	1	7	0	2016-03-12	0	0	0	0
2016-04-25	MP	RWA	2016	1	0	2016-05-16	1	11	11	30	1	2016-03-11	2	42	2	9	2016-03-12	2000-01-01	8	2000-01-01	0	8	1	2016-05-30	3	0	4	4	860	0	0	0	2016-02-21	1	0	1	2	1	2016-03-11	1	1	0	0
2016-06-17	MP	RWA	2016	1	0	2016-06-14	1	999	19	24	1	2016-05-20	1	38	2	9	2016-05-23	2000-01-01	8	2000-01-01	0	8	1	2016-08-05	3	2	2	5	500	0	0	0	2016-04-15	1	0	1	7	1	2016-05-20	1	1	0	0
2016-06-17	MP	RWA	2016	1	1	2016-06-14	1	9	9	30	2	2016-05-17	1	32	0	0	2016-05-30	2016-04-19	1	2016-05-17	0	8	1	2016-08-02	2	0	4	4	200	1	1	0	2016-05-10	0	0	0	7	0	2016-05-17	0	0	0	0
2016-07-21	MP	RWA	2016	1	0	2016-07-21	1	10	10	25	2	2016-05-27	3	39	2	9	2016-06-03	2000-01-01	8	2000-01-01	0	8	1	2016-09-10	0	3	0	4	250	1	1	0	2016-05-20	1	0	1	2	1	2016-05-27	1	1	0	0
2016-07-21	MP	RWA	2016	1	1	2016-07-21	1	3	3	40	1	2016-05-26	3	38	0	0	2016-06-04	2016-05-12	1	2016-05-12	0	8	1	2016-08-04	0	1	4	4	857	0	0	0	2016-02-15	1	0	1	7	1	2016-06-04	1	1	1	0
2016-07-21	MP	RWA	2016	1	1	2016-07-21	1	3	3	55	1	2016-05-26	3	41	2	0	2016-06-04	2016-05-26	1	2016-05-26	0	8	1	2016-08-04	0	0	3	4	1114	1	1	0	2016-04-26	1	0	1	7	0	2016-05-26	0	0	1	1
2016-07-21	MP	RWA	2016	1	1	2016-07-21	1	3	3	52	1	2016-05-26	3	45	2	0	2016-06-04	2016-05-26	1	2016-05-26	0	8	1	2016-08-04	3	0	4	4	450	0	0	0	2016-05-16	0	0	1	7	0	2016-05-26	0	0	1	1
2016-07-21	MP	RWA	2016	1	0	2016-07-21	1	8	8	38	9	2016-06-08	3	41	2	9	2016-06-10	2000-01-01	8	2000-01-01	0	8	1	2016-08-03	3	0	4	4	1066	0	0	0	2016-04-02	0	0	0	7	1	2016-06-08	1	1	1	0
2016-07-21	MP	RWA	2016	1	0	2016-07-21	1	15	15	35	2	2016-06-07	1	38	2	9	2016-06-07	2000-01-01	8	2000-01-01	0	8	1	2016-09-10	0	3	2	4	1000	1	1	9	2016-03-30	1	0	1	6	3	2016-06-07	1	1	0	0
2016-07-21	MP	RWA	2016	1	0	2016-07-21	1	10	10	55	2	2016-06-06	9	49	2	9	2016-06-07	2000-01-01	8	2000-01-01	0	8	1	2016-08-03	0	0	2	3	667	0	0	0	2016-05-16	0	0	0	7	1	2016-06-06	1	1	0	0
2016-07-21	MP	RWA	2016	1	1	2016-07-21	1	9	9	25	1	2016-06-03	3	46	0	0	2016-06-10	2016-06-03	1	2016-06-03	0	8	1	2016-09-10	1	2	4	4	400	0	0	0	2015-06-20	1	1	1	7	2	2015-08-10	1	2	1	1
2016-07-21	MP	RWA	2016	1	1	2016-07-21	1	3	3	22	2	2016-06-03	1	38	0	0	2016-06-10	2016-06-03	1	2016-06-03	0	8	1	2016-09-10	5	4	1	4	625	1	0	0	2016-05-16	1	0	1	7	1	2016-06-04	1	1	0	0
2016-07-21	MP	RWA	2016	1	0	2016-07-21	1	8	8	19	1	2016-06-20	1	29	2	9	2016-06-21	2000-01-01	8	2000-01-01	0	8	1	2016-09-08	3	1	1	4	900	1	1	0	2016-06-05	1	0	1	1	1	2016-06-10	1	1	0	0
2016-07-21	MP	RWA	2016	1	0	2016-07-21	1	3	3	22	1	2016-06-02	1	48	0	0	2016-06-21	2000-01-01	8	2000-01-01	0	8	1	2016-09-08	3	5	4	7	1125	0	0	0	2016-04-15	0	0	1	6	1	2016-06-20	1	1	1	0
2016-07-21	MP	RWA	2016	1	1	2016-07-21	1	12	12	42	2	2016-05-26	3	41	2	9	2016-06-03	2016-05-26	1	2016-05-26	0	8	1	2016-08-02	0	0	3	4	400	0	0	0	2016-04-10	0	0	0	7	0	2016-05-26	0	0	1	0
2016-08-25	MP	RWA	2016	1	1	2016-08-24	1	10	10	84	1	2016-06-14	2	42	0	0	2016-06-27	2016-06-10	1	2016-06-14	0	8	1	2016-09-24	0	0	3	3	250	0	0	0	2016-04-01	1	1	1	4	1	2016-04-15	1	2	0	0
2016-08-25	MP	RWA	2016	1	1	2016-08-24	1	10	10	55	1	2016-06-14	3	42	0	0	2016-06-27	2016-06-12	1	2016-06-14	0	8	1	2016-09-25	1	1	4	4	1000	1	0	0	2015-10-15	1	1	1	7	2	2015-11-15	1	2	0	0
2016-08-25	MP	RWA	2016	1	0	2016-08-24	1	14	14	55	1	2016-07-25	1	99	0	0	2016-07-27	2000-01-01	8	2000-01-01	0	8	1	2016-09-25	2	2	5	5	1500	0	0	0	2016-04-12	1	0	1	5	7	2016-04-16	1	2	0	1
2016-10-26	MP	RWA	2016	1	0	2016-10-20	1	14	14	22	1	2016-08-11	1	29	0	0	2016-09-02	2000-01-01	8	2000-01-01	0	8	1	2016-11-19	3	0	4	4	100	1	1	0	2015-06-15	1	1	1	6	1	2016-08-11	1	1	0	0
2016-10-26	MP	RWA	2016	1	1	2016-10-20	1	3	3	65	2	2016-09-16	9	44	0	0	2016-09-23	2016-09-12	1	2016-09-16	0	8	1	2016-11-19	0	5	2	4	1071	1	0	0	2016-09-12	1	0	1	7	0	2016-09-16	0	0	0	0
2017-02-02	MP	RWA	2016	1	0	2016-12-10	1	16	16	27	1	2016-11-10	1	55	0	0	2016-11-10	2000-01-01	8	2000-01-01	0	8	1	2017-04-05	3	0	4	4	640	0	0	9	2016-11-03	1	1	1	1	1	2016-11-09	1	1	1	1
2016-10-13	PB	BTD	2016	1	0	2016-12-08	0	3	3	50	1	2016-05-25	1	42	0	0	2016-05-27	2000-01-01	8	2000-01-01	0	8	1	2017-01-20	2	0	4	4	7500	1	0	0	2016-05-10	1	1	1	3	1	2016-05-25	1	1	1	1
2016-08-27	PB	BTD	2016	1	0	2016-08-27	0	0	3	35	1	2016-07-16	2	45	0	0	2016-07-25	2000-01-01	8	2000-01-01	0	8	1	2016-10-26	0	2	6	6	5250	0	0	0	2015-07-01	1	0	1	3	2	2016-07-09	2	3	1	1
2016-10-13	PB	BTD	2016	1	1	2016-10-13	1	6	6	40	2	2016-09-22	0	45	0	0	2016-09-30	2016-09-07	1	2016-09-22	0	8	1	2016-10-24	1	2	2	4	1000	0	0	0	2016-07-22	0	0	1	7	0	2016-09-22	0	0	0	0
2016-08-20	PB	BTD	2016	1	1	2016-08-22	1	5	5	45	1	2016-07-29	3	45	0	0	2016-08-01	2016-07-17	2	2016-07-17	0	8	1	2016-10-20	0	3	4	4	1125	0	0	0	2016-06-29	1	0	0	7	3	2016-07-23	1	2	1	1
2017-02-28	PB	BTD	2017	1	0	2017-02-28	1	6	6	60	1	2017-01-10	0	57	0	0	2017-01-11	2000-01-01	8	2000-01-01	0	8	1	2017-04-21	0	4	6	6	7000	1	1	0	2016-12-10	1	0	1	3	3	2016-12-10	2	3	1	1
2016-07-18	TN	CUD	2016	1	0	2016-07-27	1	11	11	40	1	2016-05-18	2	0	0	9	2016-05-18	2000-01-01	8	2000-01-01	0	8	1	2016-07-28	1	2	4	4	1000	0	0	0	2015-12-02	0	0	0	4	4	2016-02-17	1	2	1	0
2016-07-18	TN	CUD	2016	1	1	2016-07-27	1	5	5	55	1	2016-06-18	1	43	9	9	2016-06-20	2016-06-10	2	2016-06-10	0	8	1	2016-07-29	4	4	4	4	1500	0	0	0	2016-05-03	0	0	1	7	1	2016-06-18	1	1	1	0
2016-10-21	TN	CUD	2016	1	0	2016-10-31	1	7	7	32	2	2016-09-21	2	38	0	0	2016-09-21	2000-01-01	8	2000-01-01	0	8	1	2016-11-18	5	5	3	7	2000	1	0	0	2016-07-05	1	0	1	8	2	2016-09-15	1	2	0	0
2016-11-29	TN	CUD	2016	1	1	2017-02-12	1	16	16	16	2	2016-10-10	0	30	0	0	2016-10-17	2016-10-02	1	2016-10-16	0	8	1	2017-04-28	4	2	1	5	10000	0	0	0	2016-01-04	0	0	0	7	1	2016-01-17	1	1	0	0
2016-11-29	TN	CUD	2016	1	1	2017-02-12	1	16	16	60	1	2016-10-13	3	41	0	0	2016-10-14	2016-09-22	1	2016-10-12	0	8	1	2017-04-28	2	2	3	3	4000	0	0	0	2016-10-11	0	0	0	7	1	2016-10-14	1	1	0	1
2016-04-26	TN	CUD	2016	1	0	2016-05-30	1	4	4	60	2	2016-03-10	3	39	0	9	2016-03-15	2000-01-01	8	2000-01-01	0	8	1	2016-06-21	0	4	4	4	600	0	0	0	2016-03-09	1	2	1	6	2	2016-03-09	1	2	0	0
2016-04-26	TN	CUD	2016	1	1	2016-05-30	1	4	4	65	1	2016-03-14	1	45	0	0	2016-03-14	2016-03-05	2	2016-03-05	0	8	1	2016-06-04	4	4	0	0	999999	0	0	0	2015-12-14	2	0	1	7	1	2016-03-14	1	1	0	1
2016-04-26	TN	CUD	2016	1	1	2016-05-30	1	4	4	18	2	2016-03-15	2	38	0	9	2016-03-16	2016-03-04	2	2016-03-04	0	8	1	2016-06-22	5	2	1	6	400	1	0	0	2015-12-30	1	0	1	7	2	2016-03-15	1	1	0	0
2016-04-26	TN	CUD	2016	1	1	2016-05-30	1	4	4	61	1	2016-03-28	1	40	0	9	2016-03-29	2016-03-21	2	2016-03-25	0	8	1	2016-06-21	0	0	4	4	1250	0	0	0	2016-02-28	1	0	1	7	1	2016-03-28	0	0	0	0
2016-04-26	TN	CUD	2016	1	0	2016-05-30	1	6	6	72	1	2016-02-29	1	42	0	9	2016-03-01	2000-01-01	8	2000-01-01	0	8	1	2016-06-21	2	2	0	0	1000	0	0	0	2015-12-29	1	0	1	0	1	2016-01-29	1	1	0	0
2016-04-26	TN	CUD	2016	1	0	2016-05-30	1	12	26	55	2	2016-03-09	1	48	0	9	2016-03-10	2000-01-01	8	2000-01-01	0	8	1	2016-06-22	0	0	2	6	999999	0	0	0	2016-02-28	0	0	1	4	2	1800-01-01	1	1	0	0
2017-01-31	TN	CUD	2016	1	0	2017-02-12	1	12	9	39	1	2016-12-24	2	49	0	0	2016-12-24	2000-01-01	8	2000-01-01	0	8	1	2017-04-27	5	5	6	4	9000	0	0	0	2016-12-16	1	0	1	4	2	2016-12-16	1	1	0	0
2017-01-31	TN	CUD	2016	1	1	2017-02-12	1	14	14	42	1	2016-12-23	1	46	0	0	2016-12-27	2016-12-11	1	2016-12-22	0	8	1	2017-04-28	4	4	5	5	2000	1	1	0	2016-12-05	0	1	1	7	2	2016-12-07	1	2	1	0
2016-06-15	TN	CUD	2016	1	1	2016-07-14	1	6	6	50	2	2016-05-12	1	51	0	9	2016-05-12	2016-05-03	2	2016-05-03	0	8	1	2016-06-21	0	0	4	4	750	1	0	0	2016-04-23	0	0	2	7	1	2016-04-28	1	2	0	0
2016-06-15	TN	CUD	2016	1	0	2016-07-14	1	6	6	18	2	2016-05-10	1	37	0	9	2016-05-16	2000-01-01	8	2000-01-01	0	8	1	2016-06-21	5	5	1	6	3500	1	0	0	2016-04-22	1	0	1	6	2	2016-05-05	1	2	0	0
2016-06-15	TN	CUD	2016	1	0	2016-07-14	1	12	12	47	1	2016-05-25	2	45	0	9	2016-05-30	2000-01-01	8	2000-01-01	0	8	1	2016-06-21	3	3	4	4	3000	0	0	0	2016-05-23	0	0	1	5	2	2016-05-23	1	2	1	0
2016-09-17	TN	CUD	2016	1	1	2016-10-11	1	13	13	55	2	2016-07-18	1	47	0	0	2016-07-18	2016-07-12	2	2016-07-17	0	8	1	2016-11-18	0	4	5	4	1000	0	0	0	2016-06-28	1	0	2	7	1	2016-07-17	1	1	0	0
2016-09-17	TN	CUD	2016	1	0	2016-10-21	1	11	14	48	1	2016-07-26	2	49	0	0	2016-07-28	2000-01-01	8	2000-01-01	0	8	1	2016-11-18	2	2	4	4	5000	0	0	0	2016-07-04	1	0	1	0	1	2016-07-06	1	1	0	0
2016-09-17	TN	CUD	2016	1	1	2016-10-11	1	12	13	52	1	2016-08-17	1	46	0	0	2016-08-22	2016-08-11	1	2016-08-16	0	8	1	2016-11-18	1	1	3	3	999999	1	0	0	2016-07-26	1	1	2	7	1	2016-08-17	1	1	0	0
2016-09-17	TN	CUD	2016	1	0	2016-10-11	1	12	12	35	1	2016-08-12	2	39	0	0	2016-08-12	2000-01-01	8	2000-01-01	0	8	1	2016-11-18	4	0	4	4	1000	1	0	0	2016-07-21	1	1	1	2	2	2016-07-25	1	2	0	0
2017-02-18	TN	CUD	2017	1	0	2017-03-16	1	9	14	40	2	2017-01-10	1	38	0	0	2017-01-21	2000-01-01	8	2000-01-01	0	8	1	2017-04-27	0	0	5	5	2000	1	1	0	2017-01-02	1	0	1	6	2	2017-02-10	1	2	0	0
2016-04-26	TN	CUD	2016	1	1	2016-05-25	1	3	3	70	1	2016-03-05	2	40	0	9	2016-03-05	2016-02-27	1	2016-03-05	0	8	1	2016-06-22	2	2	8	8	2500	0	0	0	2015-12-20	1	0	1	7	1	2016-03-05	1	1	1	1
2016-04-26	TN	CUD	2016	1	0	2016-05-25	1	3	3	27	2	2016-03-17	2	40	0	9	2016-03-21	2000-01-01	8	2000-01-01	0	8	1	2016-06-22	3	3	2	4	1250	0	0	0	2016-02-02	1	0	1	5	2	2016-03-13	1	2	0	0
2016-07-16	TN	CUD	2016	1	0	2016-07-27	1	12	15	54	1	2016-06-15	2	43	0	9	2016-06-16	2000-01-01	8	2000-01-01	0	8	1	2016-07-30	2	2	5	5	4400	0	0	0	2015-11-15	1	0	1	5	3	2016-03-01	1	2	0	0
2016-07-16	TN	CUD	2016	1	1	2016-07-27	1	10	13	51	1	2016-06-14	1	43	0	1	2016-06-14	2016-06-09	1	2016-06-13	0	8	1	2016-07-28	1	1	7	7	5000	0	0	0	2015-08-15	0	0	1	7	2	2016-08-16	1	2	0	1
2016-07-16	TN	CUD	2016	1	1	2016-07-27	1	10	13	75	2	2016-06-14	1	50	0	0	2016-06-18	2016-06-07	1	2016-06-13	0	8	1	2016-07-28	0	3	4	8	1840	1	0	0	2016-03-29	1	0	0	7	2	2016-03-29	1	2	0	0
2016-07-16	TN	CUD	2016	1	1	2016-07-27	1	10	13	40	1	2016-06-18	1	43	0	0	2016-06-20	2016-06-08	2	2016-06-08	0	8	1	2016-07-30	2	2	5	5	1250	0	0	0	2016-05-15	1	0	1	7	5	2016-05-17	2	3	0	0
2016-07-16	TN	CUD	2016	1	0	2016-07-27	1	11	14	60	2	2016-06-14	1	39	0	0	2016-06-20	2000-01-01	8	2000-01-01	0	8	1	2016-07-30	0	0	2	2	2400	0	0	0	2016-01-30	0	0	0	5	3	2016-03-30	1	2	0	0
2016-07-16	TN	CUD	2016	1	0	2016-07-27	1	12	15	61	2	2016-06-08	2	39	0	0	2016-06-18	2000-01-01	8	2000-01-01	0	8	1	2016-07-29	2	2	4	4	2277	0	0	0	2015-11-23	1	0	0	5	3	2016-04-09	1	2	0	0
2016-08-19	TN	CUD	2016	1	0	2016-08-19	1	4	4	56	1	2016-07-13	2	46	0	0	2016-07-13	2000-01-01	8	2000-01-01	0	8	1	2016-11-17	1	1	4	4	5000	0	0	0	2016-06-01	1	0	1	5	1	2016-06-13	1	1	1	1
2016-08-19	TN	CUD	2016	1	1	2016-08-19	1	5	5	80	2	2016-07-23	1	44	0	0	2016-07-27	2016-07-04	1	2016-07-22	0	8	1	2016-11-17	0	4	4	3	4000	0	0	0	2016-07-16	1	0	2	7	1	2016-07-27	1	1	0	0
2016-09-17	TN	CUD	2016	1	0	2016-10-23	1	7	11	47	1	2016-07-23	2	49	0	0	2016-07-25	2000-01-01	8	2000-01-01	0	8	1	2016-11-17	3	3	5	5	2000	0	0	0	2016-05-06	1	1	1	5	3	2016-05-08	1	2	2	0
2016-09-17	TN	CUD	2016	1	0	2016-10-11	1	13	13	46	1	2016-07-26	2	48	0	0	2016-07-27	2000-01-01	8	2000-01-01	0	8	1	2016-11-17	1	1	8	8	1000	1	0	0	2016-07-19	0	1	1	5	2	2016-07-25	1	2	0	1
2016-09-17	TN	CUD	2016	1	1	2016-09-19	1	7	7	16	1	2016-07-27	1	42	0	0	2016-07-27	2016-07-22	1	2016-07-26	0	8	1	2016-11-17	4	2	1	4	4000	0	0	0	2016-07-11	1	0	1	7	1	2016-07-22	1	1	0	0
2016-09-17	TN	CUD	2016	1	1	2016-09-19	1	7	7	50	1	2016-07-27	1	48	0	0	2016-07-29	2016-07-26	1	2016-07-26	0	8	1	2016-11-17	1	1	4	4	4500	0	0	0	2016-07-17	0	0	1	7	1	2016-07-26	1	1	1	1
2016-11-29	TN	CUD	2016	1	0	2017-02-12	1	11	11	45	2	2016-10-20	3	50	0	0	2016-10-31	2000-01-01	8	2000-01-01	0	8	1	2017-04-25	1	1	5	5	3300	0	0	0	2016-10-11	1	0	1	5	5	2016-10-12	1	2	0	0
2017-02-18	TN	CUD	2017	1	0	2017-03-16	1	11	30	53	1	2016-12-19	3	38	0	0	2016-12-30	2000-01-01	8	2000-01-01	0	8	1	2017-04-27	1	1	5	5	3000	0	0	0	2016-11-25	1	0	1	4	2	2016-12-04	1	1	1	1
2017-02-18	TN	CUD	2017	1	0	2017-03-16	1	13	21	32	2	2016-12-26	3	49	0	0	2017-01-06	2000-01-01	8	2000-01-01	0	8	1	2017-04-27	3	1	5	5	5000	0	0	0	2016-12-15	1	0	1	0	1	2016-12-26	1	1	0	0
2017-02-18	TN	CUD	2017	1	0	2017-03-16	1	14	19	30	2	2017-01-03	3	44	0	1	2017-01-07	2000-01-01	8	2000-01-01	0	8	1	2017-04-27	3	4	3	9	4000	0	0	0	2016-12-28	1	1	1	5	2	2016-12-25	1	2	0	0
2017-02-18	TN	CUD	2017	1	0	2017-03-16	1	8	11	36	2	2017-01-05	3	42	0	1	2017-01-11	2000-01-01	8	2000-01-01	0	8	1	2017-04-27	2	1	5	5	2000	0	0	0	2016-12-12	1	0	1	8	3	2016-12-11	1	2	0	0
2017-02-18	TN	CUD	2017	1	1	2017-03-16	1	6	6	65	1	2017-01-30	0	45	0	0	2017-02-02	2017-01-14	1	2017-01-26	0	8	1	2017-04-27	1	1	5	5	3500	0	0	0	2016-12-24	1	0	1	5	2	2016-12-25	1	2	0	0
2017-02-18	TN	CUD	2017	1	1	2017-03-16	1	6	6	45	2	2017-01-30	1	38	0	0	2017-01-30	2017-01-11	1	2017-01-26	0	8	1	2017-04-28	1	5	9	1	4000	0	0	0	2017-01-12	1	0	0	7	1	2017-01-30	1	1	0	0
2017-02-18	TN	CUD	2017	1	0	2017-03-16	1	13	13	56	2	2017-01-24	2	40	0	0	2017-01-25	2000-01-01	8	2000-01-01	0	8	1	2017-04-27	1	1	5	5	3000	0	0	0	2017-01-10	1	0	1	5	4	2017-01-11	1	2	0	0
2017-02-18	TN	CUD	2017	1	1	2017-03-16	1	6	6	21	1	2017-01-23	3	39	0	0	2017-01-30	2017-01-05	1	2017-01-23	0	8	1	2017-04-28	5	1	4	4	2000	1	1	0	2017-01-06	1	1	1	7	2	2017-01-23	1	1	0	0
2016-07-25	TN	KNG	2016	1	0	2016-07-25	1	12	15	55	2	2016-05-03	1	49	9	1	2016-05-09	2000-01-01	8	2000-01-01	0	8	1	2016-07-29	0	0	3	7	1363	0	0	0	2016-01-18	1	0	1	5	4	2016-01-18	1	2	0	0
2016-07-23	TN	KNG	2016	1	1	2016-07-23	1	7	7	70	1	2016-05-09	1	32	9	0	2016-05-25	2016-04-24	1	2016-05-09	0	8	1	2016-07-29	0	0	3	3	750	0	0	0	2016-04-24	1	0	1	7	0	2016-05-09	0	0	0	1
2016-10-06	TN	KNG	2016	1	0	2016-11-11	1	8	20	50	1	2016-08-09	3	49	9	9	1800-01-01	2000-01-01	8	2000-01-01	0	8	1	2016-11-27	1	1	4	4	7500	0	0	0	2016-02-09	0	0	1	8	2	2016-06-28	1	2	1	0
2016-10-06	TN	KNG	2016	1	0	2016-08-31	1	14	14	36	1	2016-08-16	3	44	1	9	2016-08-17	2000-01-01	8	2000-01-01	0	8	1	2016-11-27	1	1	4	4	2000	0	0	0	2016-05-01	1	0	0	0	1	2016-05-15	1	1	0	0
2016-10-06	TN	KNG	2016	1	1	2016-10-06	1	5	5	65	1	2016-08-18	1	41	9	9	1800-01-01	2016-08-08	1	2016-08-08	0	8	1	2016-11-27	0	0	3	3	833	0	0	0	2016-07-29	1	1	1	7	1	2016-08-13	1	1	1	1
2017-02-15	TN	KNG	2017	1	0	2017-03-03	1	12	12	45	1	2016-12-22	3	42	9	9	2016-12-24	2000-01-01	8	2000-01-01	0	8	1	2017-03-10	0	0	5	5	900	1	1	0	2016-11-02	1	1	1	8	1	2016-12-26	1	1	0	0
2017-02-15	TN	KNG	2017	1	0	2017-03-03	1	5	5	67	1	2017-01-11	0	40	9	9	2017-01-18	2000-01-01	8	2000-01-01	0	8	1	2017-03-10	0	0	4	4	1170	0	0	0	2017-01-08	0	1	1	8	1	2017-01-09	1	1	0	0
2016-06-21	TN	TVM	2016	1	1	2016-06-27	1	10	10	23	1	2016-03-01	1	58	0	9	2016-03-03	2016-03-01	2	2016-03-01	0	8	1	2016-06-28	4	5	4	4	7500	0	0	0	2016-02-08	1	0	0	7	2	2016-02-15	1	2	0	0
2016-06-27	TN	TVM	2016	1	0	2016-06-27	1	4	19	19	2	2016-03-10	3	40	0	9	2016-03-15	2000-01-01	8	2000-01-01	0	8	1	2016-06-28	4	0	4	4	7466	0	0	0	2015-10-28	1	0	1	4	5	2016-10-28	1	2	0	0
2016-06-27	TN	TVM	2016	1	0	2016-06-27	1	8	6	41	1	2016-03-10	3	44	0	9	2016-03-14	2000-01-01	8	2000-01-01	0	8	1	2016-06-28	5	5	9	9	3000	0	0	0	2016-02-10	1	1	1	8	1	2016-03-10	1	1	0	0
2016-06-21	TN	TVM	2016	1	1	2016-06-27	1	10	10	24	2	2016-03-21	1	47	0	9	2016-04-20	2016-03-10	2	2016-03-10	0	8	1	2016-06-28	3	4	3	4	3000	0	0	0	2016-02-21	0	0	0	7	2	2016-02-21	1	2	0	0
2016-09-23	TN	TVM	2016	1	1	2016-09-23	1	3	4	60	2	2016-08-05	2	28	0	0	2016-08-08	2016-07-21	1	2016-08-05	0	8	1	2016-10-29	0	0	4	3	1250	1	0	0	2016-04-15	0	0	1	7	2	2016-04-04	1	1	0	0
2016-09-23	TN	TVM	2016	1	0	2016-10-20	1	1	1	45	1	2016-08-18	1	35	0	0	2016-08-19	2000-01-01	8	2000-01-01	0	8	1	2016-10-25	5	5	7	7	300	0	0	0	2016-08-15	0	0	0	5	2	2016-08-15	1	2	0	0
2017-01-27	TN	TVM	2016	1	0	2017-02-14	1	7	16	31	2	2016-12-07	2	35	0	0	2016-12-09	2000-01-01	8	2000-01-01	0	8	1	2017-02-28	3	1	5	5	999999	1	0	0	2016-06-15	1	0	1	5	10	2016-06-15	1	1	0	0
2017-01-25	TN	TVM	2016	1	1	2017-02-14	1	3	7	38	1	2016-12-30	2	75	0	1	2016-12-31	2016-12-26	2	2016-12-30	0	8	1	2017-02-28	1	1	8	8	833	0	0	0	2016-12-12	1	0	1	7	2	2016-12-25	1	1	0	1
2017-02-27	TN	TVM	2017	1	0	2017-04-20	1	1	1	38	1	2017-01-24	2	38	0	0	2017-01-24	2000-01-01	8	2000-01-01	0	8	1	2017-04-25	3	3	4	4	3333	0	0	0	2016-10-25	0	0	1	4	2	2017-01-17	1	2	0	0

## Sheet: Codebook
fieldname	field label	field type	field length	field value	value label	comments
enrldt	date of enrolment	date	10	01/04/2016 to 31/03/2017		Source - linelist of patients.
stcode	code of the state	text	2	BI	Bihar	repeat
				MP	Madhya Pradesh
				TN	TamilNadu
				MH	Maharashtra
				CG	Chattisgarh
				KE	Kerala
				PB	Punjab
distcode	code of district	text	3	CPW	Pachima Champaran	repeat
				BTD	Bhatinda
				CTP	Chhatarpur
				CUD	Cuddalore
				GRL	Gwalior
				IDR	Indore
				JMI	Jamui
				KDW	Khandwa
				KNG	Krishnagiri
				MMD	Mahasamund
				MZF	Muzaffarpur
				NGC	Nagpur Municipal
				NVM	Navi Mumbai
				PNR	Pune Rural
				RWA	Rewa
				TVM	Tiruvannamalai
				WDH	Wardha
				WYD	Wayanaad
tucode	Code of TU	integer	01 to 19
yr	registration year	integer	2016-2017
formfill1	whether form filled	Integer	1	1	yes	if formfill1=2, then all other fields will be automatically filled as missing
				2	no
expstat	exposue status of patient	Integer	1	0	Unexposed / Non AS / Non Axshya SAMVAD
				1	Exposed / AS / Axshya SAMVAD
				9	Missing / Not available
datacdt1	Data collection date - part I	date	10	15/04/2016 to 30/06/2017, 01/01/1800		enter 01/01/1800 if form not filled due to exclusion of patient from study as not fitting the study criterion
residence	whether urban or rural	integer	1	0	urban
				1	rural
				9	Missing / Not available
disthf	distance from nearest health facility	Float	5	0-998
				999	Missing / Not available
distdmc	distance from nearest dmc	Float	5	0-998
				999	Missing / Not available
age	patient age	Integer	2	0-98
				99	Missing / Not available
sex	patient sex	integer	1	1	male
				2	female
				3	other
				9	Missing / Not available
dtdiag	date of diagnosis	Interger	10	01/01/2016 to 31/03/2017
				01/01/1800	Missing / Not available
spres	sputum result at diagnosis	integer	1	0	neg
				1	1+
				2	2+
				3	3+
				4	Scanty positive
				9	Missing / Not available
wt	Weight at baseline	FLoat	4	zero to 98
				99	Missing / Not available
hivstat	HIV status	Integer	1	0	Negative
				1	Positive
				2	Unknown
				9	Missing / Not available
dm	Diabetes status	Integer	1	0	Negative
				1	Positive
				9	Missing / Not available
dtrxinit	Treatment initiation date	date	10	01/01/2016 to 31/03/2017		after entry if expsstat=0 then next three variables will be not applicable and record will be saved
				01/01/1800	Missing / Not available
dtas	Date of Axshya SAMVAD activity (for expstat=1)	date	10	01/11/2015 to 31/03/2017
				01/01/1800	Missing / Not available
				2000-01-01	Not applicable if expstat=0
asstat	Axshya SAMVAD status	Integer	1	1	SCT
				2	Referred
				8	Not applicable if expstat=0
				9	Missing / Not available
sctrefdt	SCT or referral date	date	10	01/11/2015 to 31/03/2017
				01/01/1800	Missing / Not available
				2000-01-01	Not applicable if expstat=0
fieldname	field label	field type	field length	field value	value label	comments
pw	password					noenter field. Axshya is the password
sec	seconds to enter the record					noenter field
id	unique identifier	text	19			key unique. Noenter. Will be authogenerated after entry of tbregno
stcode	code of the state	text	2	BI	Bihar	repeat
				MP	Madhya Pradesh
				TN	TamilNadu
				MH	Maharashtra
				CG	Chattisgarh
				KE	Kerala
				PB	Punjab
distcode	code of district	text	3	CPW	Pachima Champaran	repeat
				BTD	Bhatinda
				CTP	Chhatarpur
				CUD	Cuddalore
				GRL	Gwalior
				IDR	Indore
				JMI	Jamui
				KDW	Khandwa
				KNG	Krishnagiri
				MMD	Mahasamund
				MZF	Muzaffarpur
				NGC	Nagpur Municipal
				NVM	Navi Mumbai
				PNR	Pune Rural
				RWA	Rewa
				TVM	Tiruvannamalai
				WDH	Wardha
				WYD	Wayanaad
tucode	Code of TU	integer	01 to 19
yr	registration year	integer	2016-2017
regno	TB registration number	integer	1-1300			After entry id should get autogenerated
excluded	whether excluded from study	integer	1	0	no
				1	Yes
exclrsn	reason for exclusion	Integer	1	1	Does not fit study participant operational defintion	if excluded=1, then formfill=2, then all other fields will be automatically filled as missing
				2	Fits operational definition as per records but excluded due to "past TB treatment" based on interview
				8	not applicable
formfill2	If not excluded, whether form filled	Integer	1	1	yes	if formfill=2, then all other fields will be automatically filled as missing
				2	no
datacdt2	Date of interview	date	10	15/04/2016 to 30/06/2017, 01/01/1800		enter 01/01/1800 if form not filled due to exclusion of patient from study as not fitting the study criterion
ednpt	highest education patient	integer	1	0	cannot read/ or write
				1	can read write, not completed primary
				2	primary completed
				3	Middle school completed
				4	Seocndary school completed
				5	Senior sec school completed/ITI and/or above
				9	Missing
ednhead	highest education head of houshold	integer	1	0	cannot read/ or write
				1	can read write, not completed primary
				2	primary completed
				3	Middle school completed
				4	Seocndary school completed
				5	Senior sec school completed/ITI and/or above
				9	Missing
occpt	occupation patient	integer	1	0	missing
				1	studying
				2	household work (F)
				3	Unemployed
				4	Daily wage labourer
				5	Agri / animal rearing
				6	Service
				7	Shopkeeper
				8	Business
				9	Professional
occhead	occupation head of household	integer	1	0	missing
				1	studying
				2	household work (F)
				3	Unemployed
				4	Daily wage labourer
				5	Agri / animal rearing
				6	Service
				7	Shopkeeper
				8	Business
				9	Professional
mipc	Monthly income per capita in INR	Integer	6	0-999999	enter 999999 for missing
tbhh	any tb patient in household ever	integer	1	0	NO
				1	Yes
				9	missing
tbdhh	any tb death in houshehold ever	integer	1	0	NO
				1	Yes
				9	missing
prevtbhist	previous history of tb in patient	integer	1	0	NO	If this answer is yes, then go back to exclude and enter it as excluded=1, exclrsn=2
				1	Yes
				9	missing
doe	date of eligibility for sputum afb	date	10	01/01/2014-31-03-2017, 01/01/1800		enter 01/01/1800 for missing
hofever	history of fever	integer	1	0	no
				1	yes
				2	cannot say
				9	missing
hohemo	history of hemoptysis	integer	1	0	no
				1	yes
				2	cannot say
				9	missing
howtloss	history of significant weight loss	integer	1	0	no
				1	yes
				2	cannot say
				9	missing
advice	whose advice led to sputum examination	integer	1	0	Self - no body advised
				1	community member
				2	MPW/ANM/ASHA/AWW
				3	RHCP
				4	Govt doc
				5	Pvt doc
				6	family member
				7	Axshya Mitra
				8	Others/somebody else
				9	Missing
hcpno	Number of HCP visited	Interger	2	0-20,99		enter 99 for missing, HELP if hcpno=0 then dthcp=date of diagnosis; hcptype = none visited; hcptype2=none visited; anycost, details and so on will be not applicable
dthcp	Date when first visited health care provider	Date	10	01/01/2014-31/03/2017, 01/01/1800		mention middle date of the month if only month and year mentioned
hcptype	Type of first health care provider visited	integer	1	0	none visited
				1	qualified
				2	Quack / Unqualified
				9	Missing
hcptype2	if qualified the type	integer	1	0	none visited
				1	Govt doc	if hctype=1 then hctype2<>3
				2	Pvt doc
				3	RHCP
				4	ANM/ASHA/MPHW/AWW
				5	Others
				9	Missing
alc	alcoholic at diagnosis	Interger	1	0	no
				1	yes
				9	missing
smk	smoker at diagnosis	Interger	1	0	no
				1	yes
				9	missing
